## RESEARCH ARTICLE

# Optineurin promotes myogenesis during muscle regeneration in mice by autophagic degradation of GSK3 $\beta$

Xiao Chen Shi<sup>1</sup>, Bo Xia<sup>1</sup>, Jian Feng Zhang, Rui Xin Zhang, Dan Yang Zhang, Huan Liu, Bao Cai Xie<sup>1</sup>, Yong Liang Wang<sup>1</sup>\*, Jiang Wei Wu<sup>1</sup>\*

Key Laboratory of Animal Genetics, Breeding and Reproduction of Shaanxi Province, College of Animal Science and Technology, Northwest A&F University, Yangling, China

<sup>1</sup> These authors contributed equally to this work.

\* [yongliang.wang@nwafu.edu.cn](mailto:yongliang.wang@nwafu.edu.cn) (YLW); [wujiangwei@nwafu.edu.cn](mailto:wujiangwei@nwafu.edu.cn) (JWW)

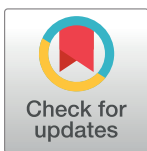

## OPEN ACCESS

**Citation:** Shi XC, Xia B, Zhang JF, Zhang RX, Zhang DY, Liu H, et al. (2022) Optineurin promotes myogenesis during muscle regeneration in mice by autophagic degradation of GSK3 $\beta$ . *PLoS Biol* 20(4): e3001619. <https://doi.org/10.1371/journal.pbio.3001619>

**Academic Editor:** Simon M. Hughes, King's College London, UNITED KINGDOM

**Received:** October 14, 2021

**Accepted:** April 4, 2022

**Published:** April 27, 2022

**Copyright:** © 2022 Shi et al. This is an open access article distributed under the terms of the [Creative Commons Attribution License](https://creativecommons.org/licenses/by/4.0/), which permits unrestricted use, distribution, and reproduction in any medium, provided the original author and source are credited.

**Data Availability Statement:** All relevant data are within the paper and its [Supporting Information files](#).

**Funding:** This work was supported by National Key Research and Development Program of China (2021YFF1000602) and National Natural Science Foundation of China (32070602) to Jiang Wei Wu. The funder had no role in study design, data collection and analysis, decision to publish, or preparation of the manuscript.

## Abstract

Skeletal muscle regeneration is essential for maintaining muscle function in injury and muscular disease. Myogenesis plays key roles in forming new myofibers during the process. Here, through bioinformatic screen for the potential regulators of myogenesis from 5 independent microarray datasets, we identify an overlapping differentially expressed gene (DEG) optineurin (OPTN). *Optn* knockdown (KD) delays muscle regeneration in mice and impairs C2C12 myoblast differentiation without affecting their proliferation. Conversely, *Optn* overexpression (OE) promotes myoblast differentiation. Mechanistically, OPTN increases nuclear levels of  $\beta$ -catenin and enhances the T-cell factor/lymphoid enhancer factor (TCF/LEF) transcription activity, suggesting activation of Wnt signaling pathway. The activation is accompanied by decreased protein levels of glycogen synthase kinase 3 $\beta$  (GSK3 $\beta$ ), a negative regulator of the pathway. We further show that OPTN physically interacts with and targets GSK3 $\beta$  for autophagic degradation. Pharmacological inhibition of GSK3 $\beta$  rescues the impaired myogenesis induced by *Optn* KD during muscle regeneration and myoblast differentiation, corroborating that GSK3 $\beta$  is the downstream effector of OPTN-mediated myogenesis. Together, our study delineates the novel role of OPTN as a potential regulator of myogenesis and may open innovative therapeutic perspectives for muscle regeneration.

## Introduction

Skeletal muscle, the most abundant tissue in our bodies, plays key roles in posture, mobility, and energy metabolism [1]. In muscle injury and muscular disease, the regeneration capacity of skeletal muscle is essential for restoration of these functions [2,3]. In response to muscle injury, satellite cells (SCs) will be activated to start myogenic differentiation, accompanied with up-regulated expression of myogenin (MYOG) and muscle-specific regulatory factor 4 [4,5]. The differentiation program is then completed with the activation of muscle specific proteins such as MYHC in myoblasts that subsequently fuse to regenerate myofibers to repair

**Competing interests:** The authors have declared that no competing interests exist.

**Abbreviations:** AAV, adeno-associated viral vector; ALS, amyotrophic lateral sclerosis; ANOVA, analysis of variance; APC, adenomatous polyposis coli protein; AXIN, axis inhibition protein; cDNA, complementary DNA; CHX, cycloheximide; CTX, cardiotoxin; CSA, cross-sectional fiber area; DEG, differentially expressed gene; DMD, Duchenne muscular dystrophy; DMEM, Dulbecco's Modified Eagle medium; DVL2, disheveled-2; Edu, 5-ethynyl-20-deoxyuridine; eMYHC, embryonic myosin heavy chain; Fermt2, fermitin family homolog 2; FRAT, frequently rearranged in advanced T-cell lymphoma; GEO, Gene Expression Omnibus; GSK3 $\beta$ , glycogen synthase kinase 3 $\beta$ ; HE, hematoxylin-eosin; H3, histone H3; KD, knockdown; LIR, LC3-interacting region; mdx, murine X-linked muscular dystrophy; MYHC, myosin heavy chain; Myod, myoblast determination protein; MYOG, myogenin; Myf5, myogenic factor 5; OE, overexpressing; OPTN, optineurin; Pax7, paired box 7; PVDF, polyvinylidene fluoride; SC, satellite cell; SDS-PAGE, sodium dodecyl sulfate-polyacrylamide gel electrophoresis; shOptn, short hairpin targeting OPTN; shRNA, short hairpin RNA; TA, tibialis anterior; TCF/LEF, T-cell factor/lymphoid enhancer factor; TCF4, transcription factor 4; UBAN, ubiquitin-binding domain; WGA, wheat germ agglutinin; WT, wild-type; 3-MA, 3-methyladenine.

damaged muscle [2]. Therefore, myoblast differentiation-mediated myogenesis plays essential roles in muscle regeneration. Nonetheless, the underlying mechanisms of myogenesis during muscle regeneration remain largely unknown.

To explore the potential regulators of myogenesis, we performed bioinformatics screen from 5 myogenesis-related microarray datasets and identified optineurin (*Optn*) as one of the 5 overlapping genes, up-regulated during myoblast differentiation and muscle regeneration, while down-regulated in Duchenne muscular dystrophy (DMD) patients and mdx mice. The human OPTN is a 74-kDa scaffold protein comprised of 577 amino acids, and the mouse *Optn* gene encodes for a 584-amino acid protein (67 kDa), which is 78% identical to human OPTN [6]. OPTN is expressed in most tissues, including muscle, liver, and brain [7–9], and plays important roles in many cellular functions [6]. It has been identified as a selective autophagy receptor involved in the various stages of the autophagic process such as cargo recognition, autophagosome formation, and autophagic degradation [10]. *OPTN* mutations were shown in several familial diseases and often occur in its autophagy-associated ubiquitin-binding domain (UBAN) [11], such as *OPTN*<sup>E478G</sup> in amyotrophic lateral sclerosis (ALS) [7] and *OPTN*<sup>R545Q</sup> in normal-tension glaucoma [12]. OPTN is highly expressed in the skeletal muscle [13], yet little is known about the role of OPTN in myogenesis and whether its function in skeletal muscle is related to autophagy.

The canonical Wnt signaling pathway plays critical roles in facilitating the differentiation of SCs during skeletal muscle regeneration [14–16]. Wnt ligands bind to frizzled receptors and members of the low-density lipoprotein receptor related protein family, activating the nuclear translocation of  $\beta$ -catenin and the formation of a complex with the T-cell factor/lymphoid enhancer factor (TCF/LEF) [17]. It enhances transcriptional activity of myogenic factors such as myogenic factor 5 (*Myf5*) [18], myoblast determination protein (*Myod*) [19], fermitin family homolog 2 (*Fermt2*) [20], and *Myog* [21] during muscle regeneration. Wnts promote  $\beta$ -catenin nuclear translocation through inhibition of glycogen synthase kinase 3 $\beta$  (GSK3 $\beta$ ), an important component of  $\beta$ -catenin destruction complex [22]. Genetic deletion or pharmacological inhibition of GSK3 $\beta$  leads to enhanced differentiation of C2C12 cells and muscle regeneration [23,24], indicating that GSK3 $\beta$  is essential for Wnt signaling pathway-mediated myoblast differentiation. Nevertheless, mechanism of Wnt-mediated suppression of GSK3 $\beta$  remains incompletely resolved and in dispute. A GSK3 $\beta$ -mediated crosstalk of autophagy and canonical Wnt signaling pathway has been shown during embryogenesis [25–27]. Whether the autophagy receptor OPTN is involved in the GSK3 $\beta$ -mediated canonical Wnt signaling pathway during muscle regeneration is completely unknown.

In this study, we show that OPTN is required for myoblast differentiation-mediated myogenesis during muscle regeneration in mice. OPTN promotes Wnt signaling pathway mediated myogenesis through direct physical interaction and autophagic degradation of GSK3 $\beta$ . Our findings reveal a new insight into mechanism underlying myogenesis during muscle regeneration and provide a potential target for muscle regeneration.

## Results

### Bioinformatic screen reveals OPTN as a potential regulator for myogenesis

To search for potential regulators of myogenesis, we compiled and intercrossed differentially expressed genes (DEGs) in 5 independent microarray datasets related to myogenesis from the Gene Expression Omnibus (GEO) database: (i) DEGs during C2C12 cell differentiation (GSE11415); (ii) DEGs during cardiotoxin (CTX)-induced muscle regeneration in mice (GSE45577); (iii) DEGs in skeletal muscle of DMD patients (GSE1004); (iv) DEGs in gastrocnemius muscle of murine X-linked muscular dystrophy (mdx) mice (GSE16438); and (v)

DEGs in vastus lateralis between young (21 to 31 years old) and old (62 to 77 years old) men (GSE80). Comprehensive analysis of the datasets yielded 5 overlapping genes ankyrin repeat domain 1 (*Ankrd1*), galectin 3 (*Lgals3*), doublecortin like kinase 1 (*Dclk1*), myosin heavy chain 8 (*Myh8*), and *Optn* (Fig 1A). Among them, *Ankrd1*, *Lgals3*, *Dclk1*, and *Myh8* have been well characterized in the regulation of myogenesis [28–32]. The roles of OPTN, a selective autophagy receptor [33], remain unclear in myogenesis.

### OPTN is essential for myogenesis during skeletal muscle regeneration

To investigate the role of OPTN in myogenesis during muscle regeneration, we analyzed OPTN expression during CTX-induced muscle injury in mice. Compared with uninjured muscle (day 0), OPTN expression was significantly up-regulated during the initial phase of muscle regeneration (day 5), and then decreased at day 14, similar to the expression profile of the newly regenerated myofiber marker embryonic myosin heavy chain (eMYHC) (Fig 1B, S1A and S1B Fig). In line with this, the immunofluorescence analysis also showed increased OPTN in the cytoplasm of newly regenerated myofibers at 5 days postinjury (Fig 1C, S2 Fig). These results indicate a potential role of OPTN in muscle regeneration. We further generated a recombinant adeno-associated viral vector (AAV) with a short hairpin RNA (shRNA) targeting *Optn* (AAV-sh*Optn*) (S3A and S3B Fig), which achieved 72% reduction in mRNA levels and 76% reduction in protein levels compared with scramble shRNA in tibialis anterior (TA) muscle (S3C and S3D Fig). The TA muscle receiving AAV scramble shRNA or sh*Optn* was subjected to a single CTX injury and then allowed to recover for 3 to 14 days before analysis of the regenerated tissue. In scramble shRNA muscle, SCs descendants fused to form new myofibers characterized by centrally localized nucleus during the acute phase of regeneration (3 to 5 days after injury) (Fig 1D). The eMYHC<sup>+</sup> fibers were abundant at day 5 postinjury (Fig 1E). In contrast, AAV-sh*Optn* muscle was composed of degenerating myofibers, fibrotic tissues, and inflammatory cells at this phase (Fig 1D). The eMYHC<sup>+</sup> regenerating fibers in AAV-sh*Optn* muscle were less and smaller at day 5 postinjury compared with scramble shRNA muscle (Fig 1E–1G). In line with this, the protein levels of eMYHC and MYOG were significantly reduced in AAV-sh*Optn* muscle at day 5 postinjury (Fig 1H–1J). Fourteen days after injury, muscle damage and inflammatory cells in scramble shRNA muscle were largely cleared, and the regenerated myofibers continued to grow and mature, as they became homogenous in size (Fig 1D), whereas small regenerated fibers and a few inflammatory cells were still shown in sh*Optn* TA muscle (Fig 1D). These data show that *Optn* knockdown (KD) delayed skeletal muscle regeneration in adult mice, indicating an essential role of OPTN in myogenesis during muscle regeneration.

### OPTN promotes myoblast differentiation-mediated myogenesis

In response to muscle injury, muscle SCs undergo massive proliferation and differentiation to form new myotubes that replace the damaged myofibers [34]. To explore the role of OPTN in myogenesis during muscle regeneration, we first detected the effect of OPTN on muscle SCs proliferation and found similar paired box 7<sup>+</sup> (Pax7) 5-ethynyl-20-deoxyuridine<sup>+</sup> (EdU) SCs frequency in sh*Optn* and scramble shRNA TA muscle at day 3 postinjury (S4A–S4D Fig). In addition, *Optn* KD in C2C12 cells had no effect on numbers of EdU<sup>+</sup> cells and the expression of cell proliferation-associated genes (S4E–S4G Fig). These results suggest that OPTN does not affect SCs proliferation during muscle regeneration. We next investigated whether OPTN-mediated myogenesis is achieved by regulation of myoblast differentiation. OPTN expression was increased during C2C12 myoblast differentiation with MYHC colocalization, similar to the expression patterns of MYOG (Fig 2A and 2B, S5A and S5B Fig). *Optn* KD in C2C12 cells



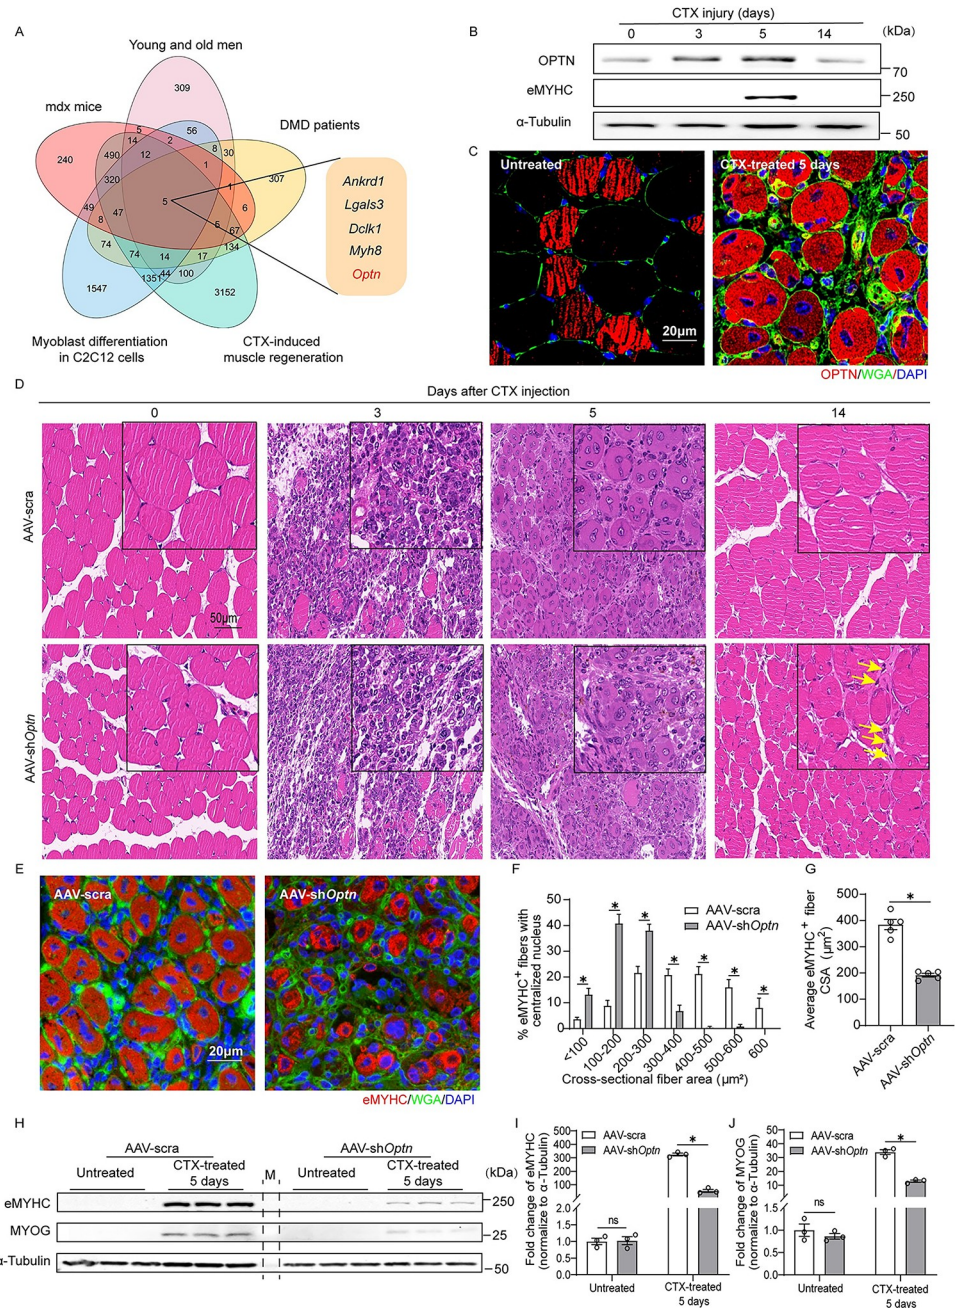

**Fig 1. OPTN is essential for myogenesis during skeletal muscle regeneration in response to muscle injury.** (A) Venn diagram showing 5 overlapping DEGs among 5 independent microarray datasets related to myogenesis or muscle atrophy. (B) Representative immunoblotting analysis of eMYHC and OPTN in TA of WT mice at 0, 3, 5, and 14 days postinjury ( $n = 3$  mice in each group). (C) Representative immunofluorescence analysis of OPTN subcellular distribution in TA muscle at CTX untreated or 5 days postinjury. The OPTN, the sarcolemma, and the nucleus were stained with anti-OPTN antibody (red), WGA (green), and DAPI (blue), respectively. Scale bars: 20  $\mu$ m. (D) Representative HE staining of TA at 0, 3, 5, and 14 days postinjury in scramble shRNA or sh*Optn* mice. The yellow arrowheads indicate inflammatory cells infiltration. Scale bar: 50  $\mu$ m. (E) Representative immunofluorescence staining of eMYHC<sup>+</sup> fibers in scramble shRNA or sh*Optn* TA muscle at 5 days postinjury. Scale bar: 20  $\mu$ m. (F) Distribution of eMYHC<sup>+</sup> myofiber CSAs in scramble shRNA or sh*Optn* TA muscle at 5 days postinjury ( $n = 5$  mice in each group). (G) Average CSA of regenerating eMYHC<sup>+</sup> myofibers in scramble shRNA or sh*Optn* TA muscle at 5 days postinjury ( $n = 5$  mice in each group). (H–J) Representative immunoblotting analysis (H) and quantification (I, J) of myogenic markers (eMYHC and MYOG) in scramble shRNA or sh*Optn* TA muscle ( $n = 3$  mice in each group) at 5 days postinjury. M, marker. Data are presented as mean  $\pm$  SEM. \* $P < 0.05$  versus control. The underlying data for this

figure can be found in [S1 Data](#). The original blot for this figure can be found in [S1 Raw Image](#). AAV, adeno-associated viral vector; Ankrd1, ankyrin repeat domain 1; CTX, cardiotoxin; CSA, cross-sectional fiber area; Dclk1, doublecortin like kinase 1; DEG, differentially expressed gene; DMD, Duchenne muscular dystrophy; eMYHC, embryonic myosin heavy chain; HE, hematoxylin–eosin; Lgals3, galectin 3; mdx, murine X-linked muscular dystrophy; Myh8, myosin heavy chain 8; MYOG, myogenin; Optn, optineurin; SEM, standard error of the mean; shRNA, short hairpin RNA; TA, tibialis anterior; WGA, wheat germ agglutinin; WT, wild-type.

<https://doi.org/10.1371/journal.pbio.3001619.g001>

reduced cell fusion and multinuclear myotube formation events ([Fig 2C–2E](#)), along with decreased levels of MYOG and MYHC ([Fig 2F–2H](#), [S6A](#) and [S6B Fig](#)). In contrast, *Optn* overexpression (OE) (plasmid HA-*Optn*) in C2C12 cells dramatically enhanced myoblast differentiation ([Fig 2I–2K](#)), accompanied with increased levels of MYOG and MYHC ([Fig 2L–2N](#), [S6C](#) and [S6D Fig](#)). Together, these findings indicate that OPTN promotes myoblast differentiation-mediated myogenesis.

### OPTN enhances myogenesis through activation of canonical Wnt signaling pathway

To explore the underlying mechanism of OPTN-mediated myogenesis, we analyzed the available gene expression profiles in *Optn* KD HeLa cells (GSE6819), a common model for deep transcriptome analysis [[35,36](#)] and a fast way to gain preliminary indications. The result showed high implication of OPTN in the regulation of Wnt signaling pathway ([Fig 3A](#)), a well-characterized pathway in myogenesis [[15](#)], with down-regulation of Wnt signaling pathway target genes [MYC proto-oncogene (*Myc*) [[37](#)], cyclin D3 (*Ccnd3*) [[38](#)], twist family BHLH transcription factor 2 (*Twist2*) [[39](#)], and MYCN proto-oncogene (*Mycn*) [[40](#)] ([Fig 3B](#)). Consistent with this, we showed reduced mRNA levels of Wnts target genes in *Optn* KD C2C12 cells ([Fig 3C](#)). TCF/LEF is the major transcription factor of Wnts target genes [[41](#)]. The TOP/FOP reporter assay showed markedly decreased transcription activity of TCF/LEF in *Optn* KD C2C12 cells, while increased in *Optn*-OE C2C12 cells ([Fig 3D](#)). It has been shown that enhanced transcription activity of TCF/LEF is mediated by increased nuclear translocation of  $\beta$ -catenin, which further forms a complex with the TCF/LEF transcription factors to regulate Wnts target genes [[17](#)]. In agreement with this, *Optn* OE increased the nuclear levels of  $\beta$ -catenin in C2C12 cells, whereas *Optn* KD reduced these levels ([Fig 3E](#), [S7A](#) and [S7B Fig](#)). Similarly, *Optn* KD also decreased nuclear levels of active  $\beta$ -catenin in TA muscle at day 5 postinjury in mice ([Fig 3F](#)). Furthermore, treatment of Wnt3a, a classical ligand of the Wnt signaling pathway [[20](#)], failed to effectively increase the nuclear levels of  $\beta$ -catenin in *Optn* KD C2C12 cells ([Fig 4A](#)) and TA muscle at day 5 postinjury ([Fig 4B](#)), suggesting that OPTN is required for the activation of canonical Wnt signaling pathway. Together, these results suggest that OPTN activates canonical Wnt signaling pathway during myogenesis.

### OPTN activates canonical Wnt signaling pathway through inhibition of GSK3 $\beta$

To further investigate how OPTN promotes nuclear translocation of active  $\beta$ -catenin, we measured the phosphorylated and total levels of disheveled-2 (DVL2), a well-recognized positive regulator of the Wnt signaling pathway [[42](#)], and found no changes in *Optn* OE ([Fig 4C](#)) or KD C2C12 cells ([Fig 4D](#)), as well as in sh*Optn* muscle at day 5 postinjury ([Fig 4E](#)) when compared with their respective controls. The axis inhibition protein (AXIN)/adenomatous polyposis coli protein (APC)/GSK3 $\beta$  destruction complex is the negative regulator of the Wnt/ $\beta$ -catenin pathway [[43–45](#)]. *Optn* OE in C2C12 cells significantly reduced protein levels of GSK3 $\beta$  without affecting the protein levels of AXIN and APC ([Fig 4C](#)). In line with this, *Optn*



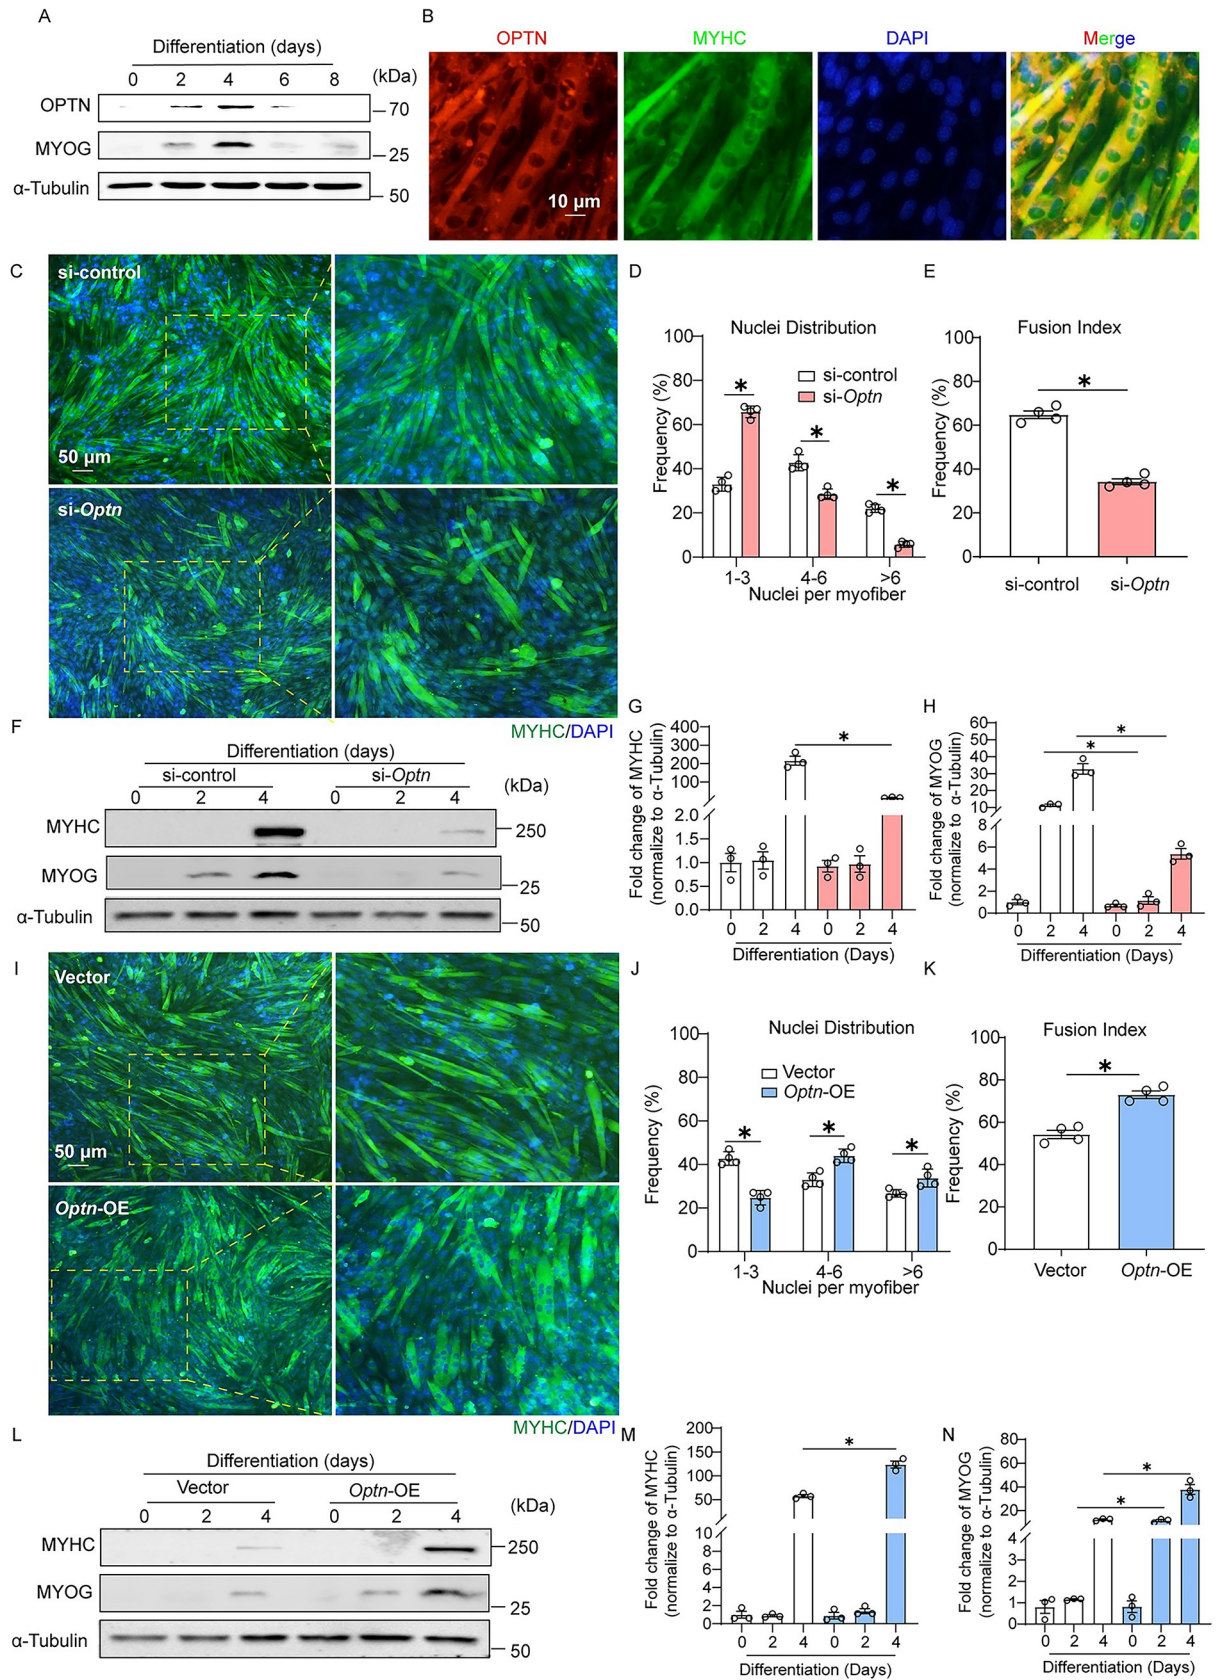

**Fig 2. OPTN promotes myoblast differentiation mediated myogenesis.** (A) Representative immunoblotting analysis of OPTN and MYOG in C2C12 cells during differentiation at the indicated time points (0, 2, 4, 6, and 8 days) ( $n = 3$  in each group). (B) Representative immunofluorescence analysis of OPTN subcellular distribution in myotubes. The OPTN and MYHC were stained with anti-OPTN antibody and anti-MYHC antibody in C2C12 cells at 4 days postdifferentiation. Scale bars: 10  $\mu\text{m}$ . (C) Representative immunofluorescence staining of MYHC in control (si-control) or *Optn* KD (si-*Optn*) C2C12 cells at 4 days postdifferentiation. si-control or si-*Optn* were transfected into C2C12 cells for 48 hours before the initiation of differentiation. Scale bars: 50  $\mu\text{m}$ . (D, E) Quantification of the nucleus distribution per myotube and fusion index (a MYHC<sup>+</sup> cell with at least 3 nucleus) in control (si-control) or *Optn* KD (si-*Optn*) C2C12 cells at 4 days postdifferentiation ( $n = 4$  in each group). (F–H) Representative immunoblotting analysis (F) and quantification (G, H) of MYHC and MYOG in control (si-control) or *Optn* KD (si-*Optn*) C2C12 cells ( $n = 3$  in each group). Cells were collected at 0, 2, and 4 days postdifferentiation, respectively. (I) Representative immunofluorescence staining of MYHC in control (empty vector) or *Optn*-OE C2C12 cells at 4 days postdifferentiation. The empty pcDNA 3.1-HA vector or pcDNA 3.1-HA-*Optn* vector were transfected into C2C12 cells for 48 hours before the initiation of differentiation. Scale bars: 50  $\mu\text{m}$ . (J, K) Quantification of the distribution of nucleus per myotube and the fusion index (a MYHC<sup>+</sup> cell with at least 3 nucleus) in control (empty vector) or *Optn*-OE C2C12 cells at 4 days postdifferentiation ( $n = 4$  in each group). (L–N) Representative immunoblotting analysis (L) and quantification (M, N) of MYHC and MYOG in control (empty vector) or *Optn*-OE C2C12 cells ( $n = 3$  in each group). Cells were collected at 0, 2, and 4 days postdifferentiation, respectively. Data are presented as mean  $\pm$  SEM. \* $P < 0.05$  versus control. The underlying data for this figure can be found in [S1 Data](#). The original blot for this figure can be found in [S1 Raw Image](#). KD, knockdown; MYOG, myogenin; MYHC, myosin heavy chain; OE, overexpressing; OPTN, optineurin; SEM, standard error of the mean.

<https://doi.org/10.1371/journal.pbio.3001619.g002>

KD in C2C12 cells (si-*Optn*) ([Fig 4D](#)) and skeletal muscle (sh*Optn*) at day 5 postinjury in mice ([Fig 4E](#)) increased GSK3 $\beta$  levels, with no changes in expression levels of AXIN and APC. Together, these results suggest that OPTN activates canonical Wnt signaling pathway through inhibition of GSK3 $\beta$  during myogenesis.

### OPTN physically interacts with and targets GSK3 $\beta$ for autophagic degradation

Given that OPTN is a selective autophagy receptor [11], we deduced that OPTN might directly mediate the degradation of GSK3 $\beta$ . Cycloheximide (CHX) chasing assay showed approximately 7 hours half-life of GSK3 $\beta$  in si-control but approximately 10 hours in *Optn* KD cells ([Fig 5A](#), [S8A Fig](#)). In contrast, *Optn* OE decreased the half-life of GSK3 $\beta$  from approximately 8 hours to approximately 5 hours ([Fig 5A](#), [S8A Fig](#)). These results indicate that OPTN accelerates the degradation of GSK3 $\beta$ . The OPTN-mediated degradation of GSK3 $\beta$  could be blocked by the autophagy inhibitor 3-methyladenine (3-MA), but not by the proteasome inhibitor MG132 ([Fig 5B](#), [S8B Fig](#)). We further demonstrated that the reduction of GSK3 $\beta$  shown in *Optn* OE was abolished in autophagy deficient *ATG5* KO HEK 293T cells ([S8C and S8D Fig](#)). Meanwhile, the ratio of LC3II to I, which correlates with autophagic flux and represents a reliable index of autophagy [46], was up-regulated in *Optn* OE C2C12 cells, while down-regulated in *Optn* KD C2C12 cells ([Fig 5C and 5D](#), [S8E Fig](#)). These results indicate that OPTN degrades GSK3 $\beta$  through autophagy pathway. Immunoprecipitation assay revealed protein–protein interaction between OPTN and GSK3 $\beta$  in C2C12 cells ([Fig 5E](#)). Immunofluorescence staining analysis showed colocalization of OPTN, GSK3 $\beta$ , and LC3 in C2C12 cells ([S8F Fig](#)). *Optn* KD reduced the interaction of LC3 and GSK3 $\beta$  in TA muscle at day 5 postinjury in mice as shown by immunoprecipitation ([S8G Fig](#)). Consistent with this, *Optn* KD decreased the colocalization of LC3 and GSK3 $\beta$  in C2C12 cells as shown by immunofluorescence staining ([Fig 5F](#)). Since OPTN has been shown to mediate autophagic degradation through LC3-interacting region (LIR) motif binding with LC3/GABARAP and UBANs binding with ubiquitin [47–49], we constructed the 2 mouse *Optn* point-mutants (F188A in LIR motif domain and E481G in UBAN domain) that are homologous with human mutants associated with its autophagic function [7,47,50] ([S8H Fig](#)). Compared with wild-type (WT) *Optn*, OE of either mutant in C2C12 cells failed to decrease the GSK3 $\beta$  levels ([Fig 5G](#), [S8I Fig](#)), nor did it promote myoblast differentiation ([Fig 5H and 5I](#)), accompanied with reduced levels of MYOG and MYHC

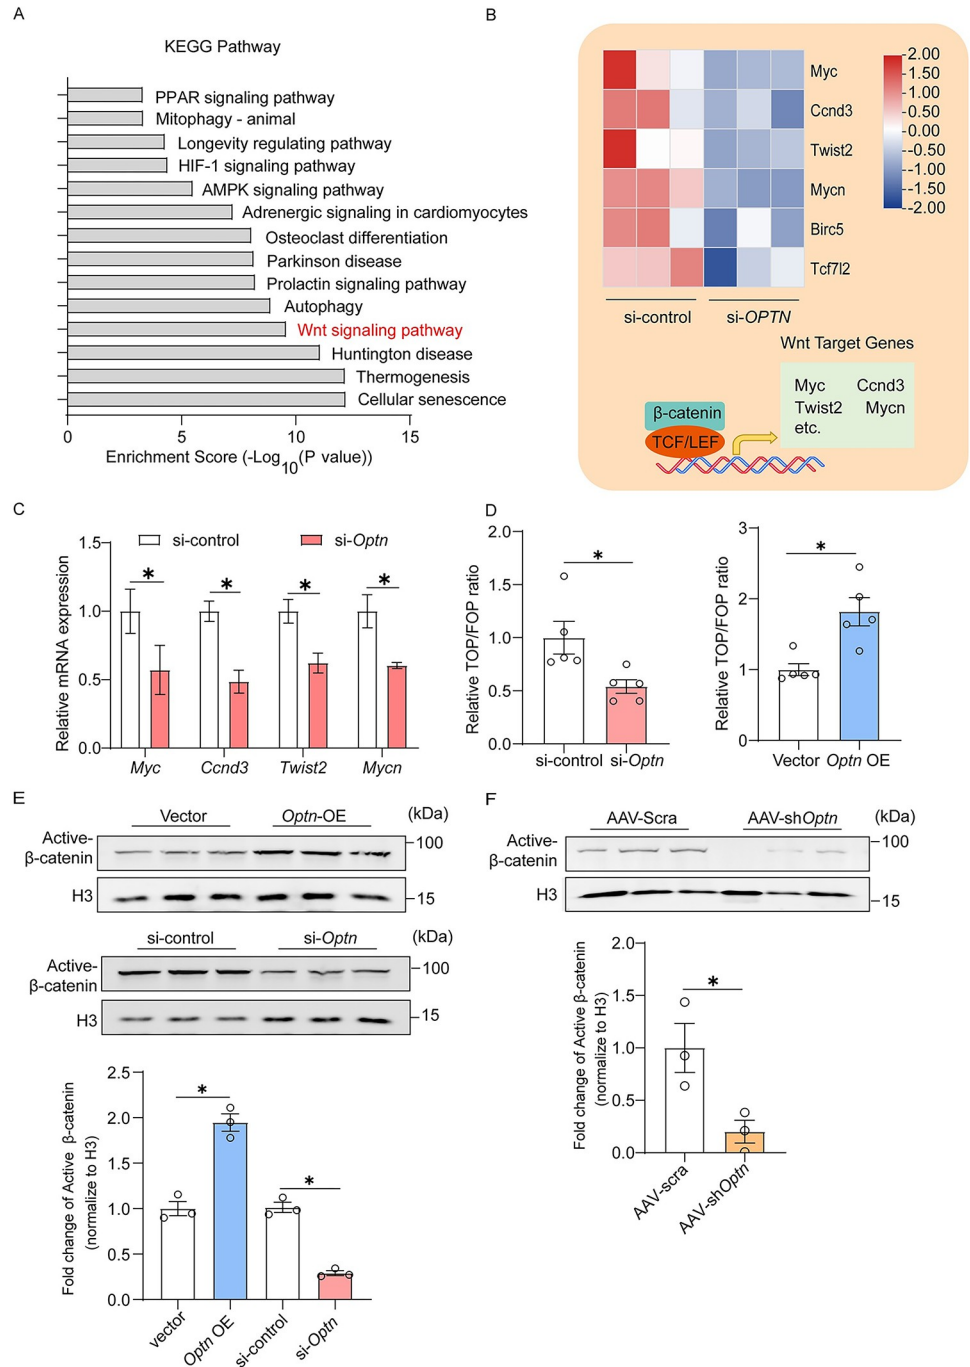

**Fig 3. OPTN activates canonical Wnt signaling pathway in myoblasts.** (A) KEGG pathway enrichment analysis in *si-Optn* HeLa cells from the GEO dataset (GSE6819). (B) Heatmap of the changes in selected Wnts target genes expression levels in *si-control* and *si-Optn* HeLa cells by RNA-seq from the GEO dataset (GSE6819). (C) Representative mRNA expression analysis of Wnt target genes in *si-control* or *si-Optn* C2C12 cells at 4 days postdifferentiation ( $n = 3$  in each group). (D) Representative luciferase activity of TOP/FOP in *Optn*-KD (left panel) and *Optn*-OE (right panel) C2C12 cells at 4 days postdifferentiation ( $n = 5$  in each group). (E, F) Representative immunoblotting analysis and quantification of active β-catenin protein levels in nuclear lysates extracted from *Optn*-OE and *Optn* KD C2C12 cells at 4 days postdifferentiation (E) ( $n = 3$  in each group) and in nuclear lysates extracted from scramble shRNA or sh*Optn* TA muscle at 5 days postinjury (F) ( $n = 3$  mice in each group). Data are presented as mean ± SEM. \*  $P < 0.05$  versus control. The underlying data for this figure can be found in [S1 Raw Image](#). AAV, adeno-associated viral vector; AMPK, AMP-activated protein kinase; Birc5, baculoviral IAP repeat containing 5; Ccnd3, cyclin D3; GEO, Gene Expression Omnibus; HIF, Hypoxia-



inducible factor; H3, histone H3; KD, knockdown; KEGG, Kyoto Encyclopedia of Genes and Genomes; Myc, MYC proto-oncogene; Mycn, MYCN proto-oncogene; OE, overexpression; Optn, optineurin; PPAR, peroxisome proliferator-activated receptor; SEM, standard error of the mean; shRNA, short hairpin RNA; TA, tibialis anterior; Tcf7l2, transcription factor 7 like 2; TCF/LEF, T-cell factor/lymphoid enhancer factor; Twist2, twist family BHLH transcription factor 2.

<https://doi.org/10.1371/journal.pbio.3001619.g003>

(Fig 5G, S8I Fig). These data indicate that OPTN degrades GSK3 $\beta$  via activating LC3-mediated autophagy.

## Inhibition of GSK3 $\beta$ rescues impaired myogenesis in *Optn* KD cells and skeletal muscle

To determine whether GSK3 $\beta$  is required for OPTN-mediated myogenesis, we inhibited the activity of GSK3 $\beta$  by its specific inhibitor CHIR and found rescued cell fusion and multinuclear myotube formation events in *Optn* KD cells (Fig 6A). The numbers of MyoG<sup>+</sup> cells were restored in *Optn* KD C2C12 cells treated with CHIR (Fig 6B). Consistent with the morphological improvement, CHIR treatment recovered the down-regulated expression levels of MYHC and MYOG in *Optn* KD differentiating myoblasts (Fig 6C and 6D) and rescued the reduced nuclear levels of  $\beta$ -catenin in *Optn* KD C2C12 cells (Fig 6E and 6F). When CHIR was injected into the TA muscle treated with AAV-sh*Optn* after CTX injury, the small size of eMYHC<sup>+</sup>

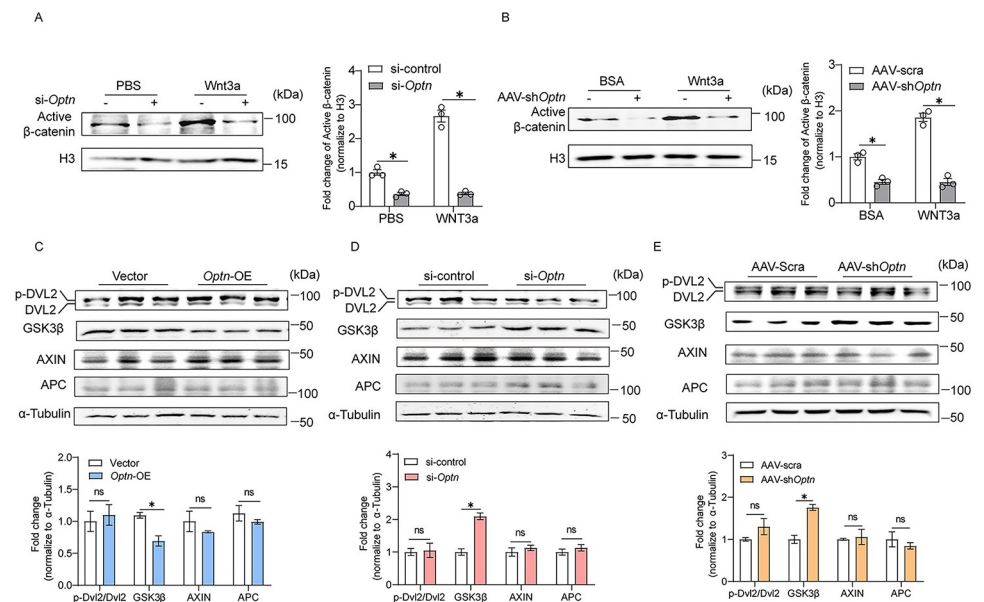

**Fig 4. GSK3 $\beta$  is negatively regulated by OPTN during myogenesis.** (A, B) Representative immunoblotting analysis and quantification of active  $\beta$ -catenin protein levels in nuclear lysates extracted from si-control or si-*Optn* C2C12 cells incubated with Wnt3a or PBS for 24 hours at 4 days postdifferentiation (A) ( $n = 3$  independent experiment) and scramble shRNA or sh*Optn* TA muscle (intramuscular injection of Wnt3a at 1.5 days postinjury) at 5 days postinjury (B) ( $n = 3$  mice in each group). (C–E) Representative immunoblotting analysis (upper panel) and quantification (lower panel) of DVL2 phosphorylation, GSK3 $\beta$ , AXIN, and APC protein levels in *Optn*-OE (C) and *Optn* KD (D) C2C12 cells at 4 days postdifferentiation ( $n = 3$  in each group), as well as in scramble shRNA or sh*Optn* muscle TA muscle at 5 days postinjury (E) ( $n = 3$  mice in each group). Data are presented as mean  $\pm$  SEM. \* $P < 0.05$  versus control. The underlying data for this figure can be found in [S1 Data](#). The original blot for this figure can be found in [S1 Raw Image](#). AAV, adeno-associated viral vector; APC, adenomatous polyposis coli protein; AXIN, axis inhibition protein; BSA, bovine serum albumin; DVL2, disheveled-2; GSK3 $\beta$ , glycogen synthase kinase 3 $\beta$ ; H3, histone H3; KD, knockdown; OE, overexpressing; Optn, optineurin; SEM, standard error of the mean; shRNA, short hairpin RNA; TA, tibialis anterior.

<https://doi.org/10.1371/journal.pbio.3001619.g004>

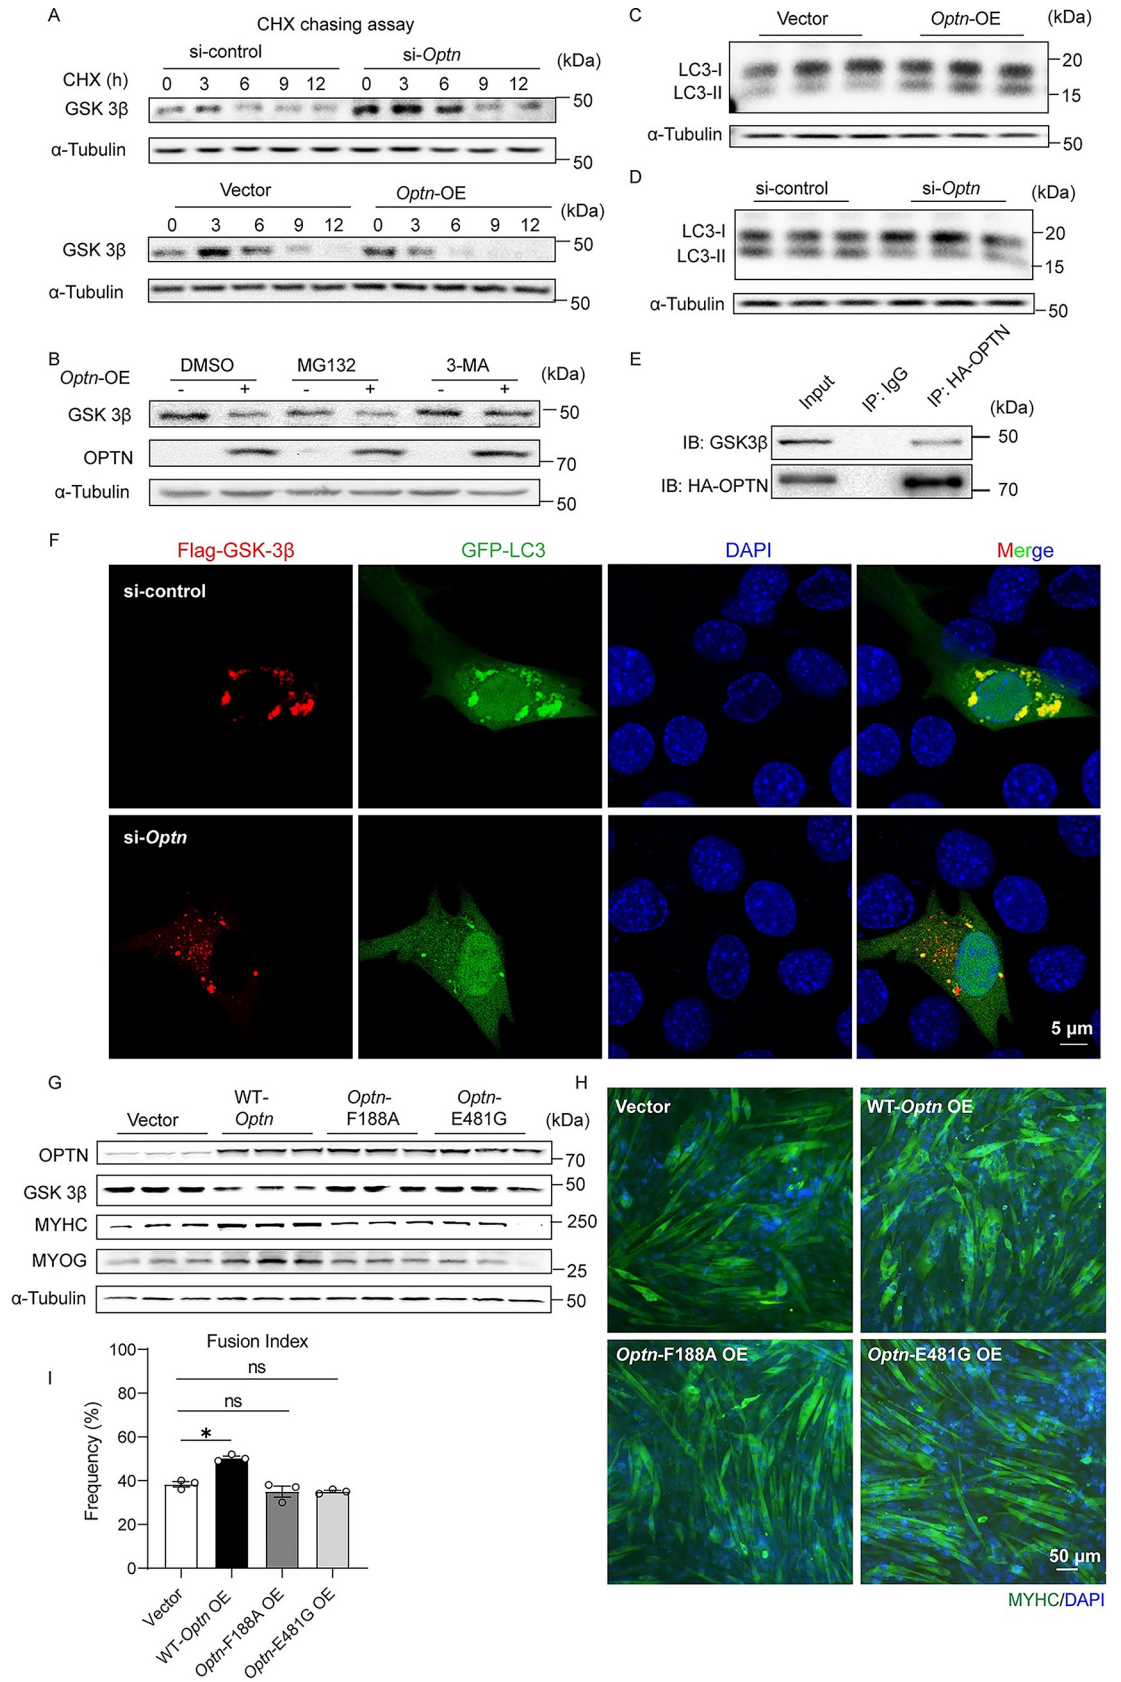

**Fig 5. OPTN degrades GSK3 $\beta$  via activating LC3-mediated autophagy.** (A) Representative immunoblotting analysis of GSK3 $\beta$  in *Optn* KD (up panel) and *Optn* OE (down panel) C2C12 cells at 4 days postdifferentiation and then treated with 50  $\mu$ g/ml CHX at indicated time points ( $n = 3$  in each group). (B) Representative immunoblotting analysis of GSK3 $\beta$  in control (empty vector) or *Optn*-OE C2C12 cells at 4 days postdifferentiation and then treated with DMSO, the proteasome inhibitor MG132 (25  $\mu$ M) or the autophagy inhibitor 3-MA (5 mM) for 6 hours ( $n = 3$  in each group). (C, D) Representative immunoblotting analysis of LC3 in *Optn* OE (C) and *Optn* KD (D) C2C12 cells at 4 days postdifferentiation ( $n = 3$  in each group). (E) Immunoprecipitation of OPTN and endogenous GSK3 $\beta$  in *Optn* OE C2C12 cells. The immunoprecipitation analysis was performed in HA-*Optn* OE C2C12 cells incubated with anti-HA antibody or nonspecific Rabbit IgG (control) to pulldown endogenous GSK3 $\beta$ . (F) Representative immunofluorescence analysis of GFP-LC3 and FLAG-GSK3 $\beta$  in si-control and si-*Optn* C2C12 cells at 4 days postdifferentiation. Scale bars: 5  $\mu$ m. (G) Representative immunoblotting analysis of OPTN, GSK3 $\beta$ , MYOG, and MYHC in empty vector, WT-*Optn*, *Optn*-F188A, and *Optn*-E481G OE C2C12 cells at 4 days postdifferentiation ( $n = 3$  in each group). (H, I) Representative immunofluorescence staining of MYHC (H) and quantification of the fusion index (I) in vector, WT-*Optn*, *Optn*-F188A, and *Optn*-E481G OE C2C12 cells at 4 days postdifferentiation ( $n = 3$  in each group). The plasmid for empty pcDNA 3.1-HA vector, pcDNA 3.1-HA-*Optn*, pcDNA 3.1-HA-*Optn*-F188A, and pcDNA 3.1-HA-*Optn*-E481G were transfected into C2C12 cells for 48 hours before the initiation of differentiation. Scale bars: 50  $\mu$ m. Data are presented as mean  $\pm$  SEM. \* $P < 0.05$  versus control. The underlying data for this figure can be found in [S1 Data](#). The original blot for this figure can be found in [S1 Raw Image](#). CHX, cycloheximide; GSK3 $\beta$ , glycogen synthase kinase 3 $\beta$ ; KD, knockdown; *Optn*, optineurin; OE, overexpressing; MYHC, myosin heavy chain; MYOG, myogenin; SEM, standard error of the mean; 3-MA, 3-methyladenine.

<https://doi.org/10.1371/journal.pbio.3001619.g005>

regenerating fibers at day 5 postinjury was efficiently rescued ([Fig 7A and 7B](#)), with concurrent restoration of eMYHC, MYOG and nuclear  $\beta$ -catenin levels ([Fig 7C–7F](#)). Cumulatively, these data suggest that OPTN activates canonical Wnt signaling mediated myogenesis during muscle regeneration through degradation of GSK3 $\beta$ .

## Discussion

The regeneration ability of skeletal muscle has a high clinical relevance in some conditions such as postinjury recovery and muscular disease, and myogenic differentiation-mediated myogenesis is a pivotal step of muscle regeneration [2,51]. Here, we identified a selective autophagy receptor OPTN from 5 independent microarray datasets as a potential regulator of myogenesis. By performing a series of in vivo and in vitro experiments, we for the first time showed that OPTN activates Wnt signaling pathway mediated myogenesis through autophagic degradation of GSK3 $\beta$  during muscle regeneration. Our findings extend the understanding of regulatory mechanisms upon Wnt signaling pathway during muscle regeneration and reveal OPTN as a potential therapeutic target for defective muscle regeneration.

OPTN promotes myogenesis via activating canonical Wnt signaling pathway. The pathway is critical for myogenesis during muscle regeneration [52], regulating SCs differentiation through  $\beta$ -catenin binding with transcription factor 4 (TCF4) on the promoter of MYOG [53,54]. The stabilization of  $\beta$ -catenin is regulated by its destruction complex components. GSK3 $\beta$ , an important component of  $\beta$ -catenin destruction complex [45], is inhibited by Wnts to stabilize  $\beta$ -catenin and activate its nuclear translocation. There are several interpretations on Wnt-mediated inhibition of GSK3 $\beta$  in different models, including dissociation of GSK3 $\beta$  from AXIN via conformational changes [55] or posttranslational modifications [56], recruitment of GSK3 inhibitory proteins such as frequently rearranged in advanced T-cell lymphomas (FRATs) [57], or degradation of AXIN [58]. In addition, Wnts were reported to inhibit GSK3 $\beta$  activity by promoting its sequestration from the cytosol into multivesicular endosomes/bodies fusing with lysosome in 293T cells [59,60]. These findings shed fresh light on the inhibition of GSK3 $\beta$  and arouse broad interest in the field [61]. Based on the fact that the multivesicular endosome/body is an obligatory step before degradation in autophagosome [62,63], degradation might be the final fate of Wnt-induced GSK3 $\beta$  sequestration. Consistent with this, our data show GSK3 $\beta$  degradation mediated by OPTN in autophagosome during myogenesis,



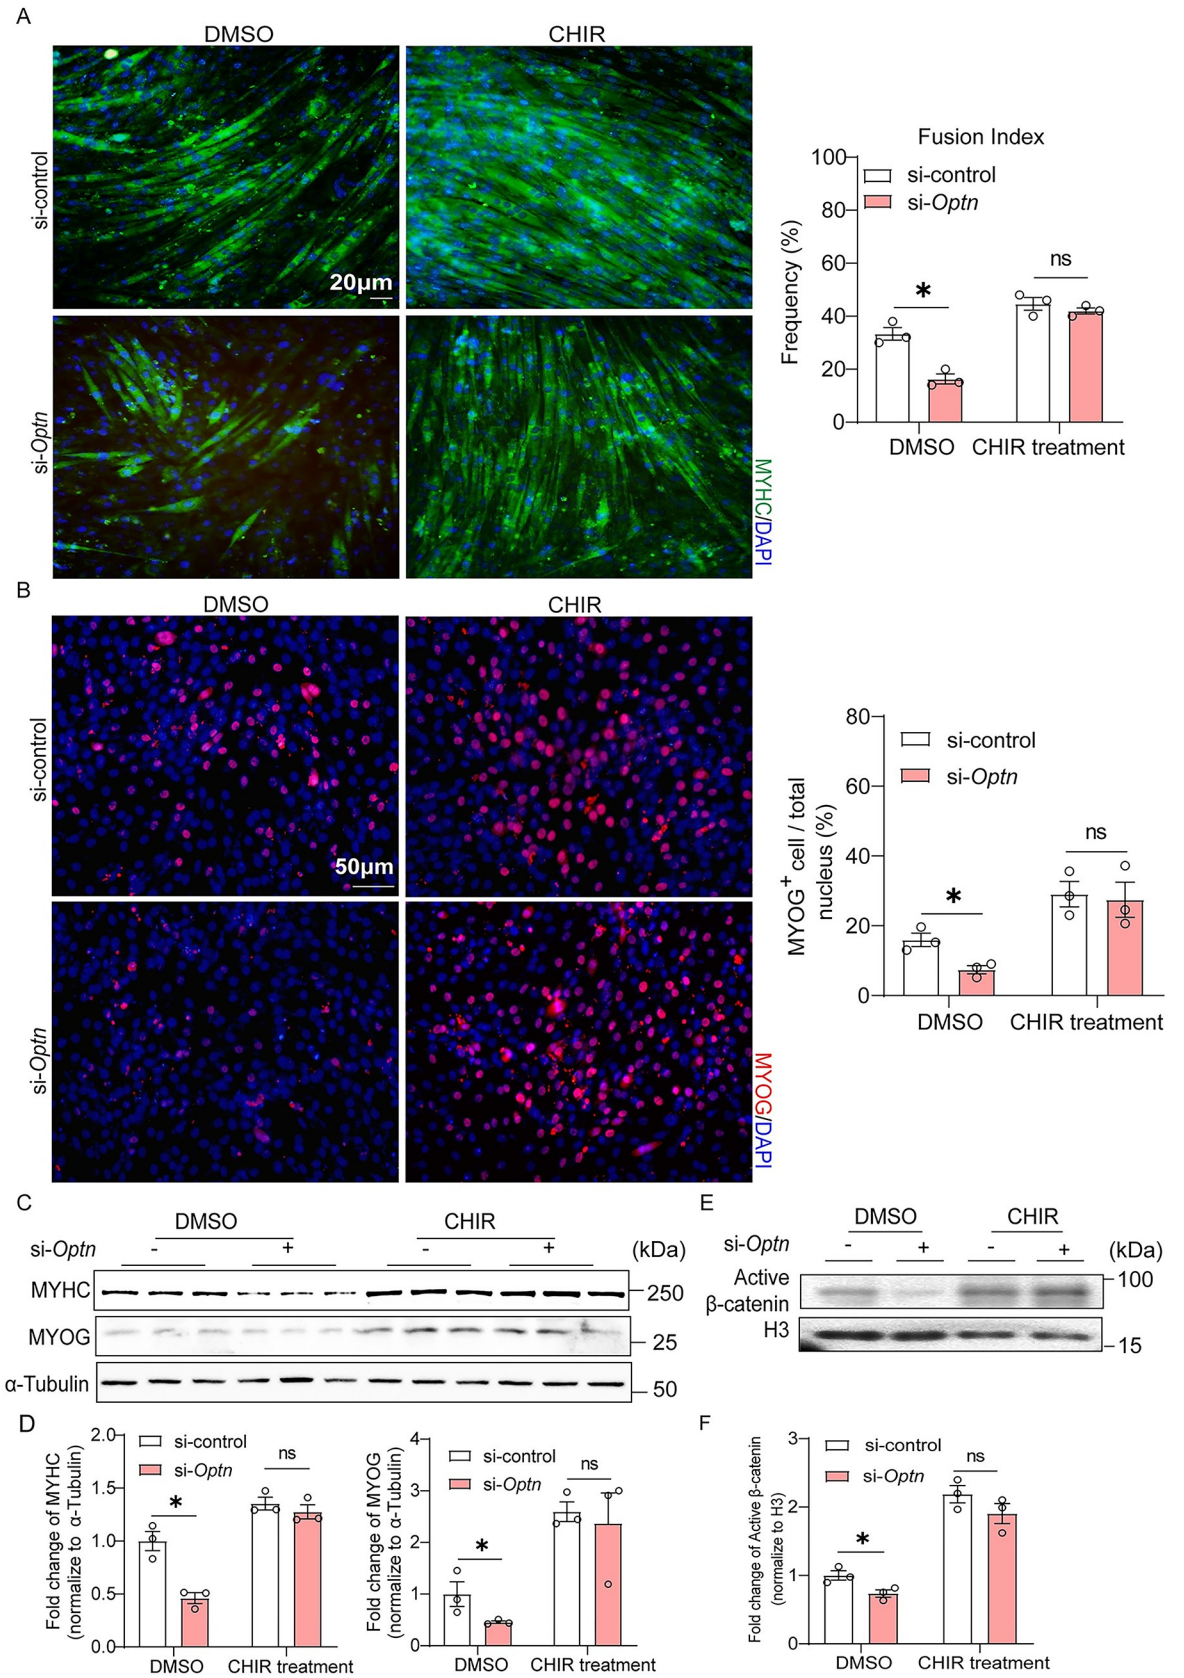

**Fig 6. Inhibition of GSK3 $\beta$  rescues impaired myogenesis during myoblast differentiation induced by *Optn* KD.** (A) Representative immunofluorescence staining of MYHC (left panel) and quantification of fusion index (a MYHC<sup>+</sup> cell with at least 3 nucleus) (right panel) in control (si-control) and *Optn* KD (si-*Optn*) C2C12 cells treated with CHIR (20  $\mu$ M) or DMSO at 4 days postdifferentiation ( $n = 3$  in each group). si-control or si-*Optn* were transfected into C2C12 cells for 48 hours before the initiation of differentiation. Scale bars: 20  $\mu$ m. (B) Representative immunofluorescence staining of MYOG (left panel) and the percentage of MYOG<sup>+</sup> cells (right panel) in control (si-control) and *Optn* KD (si-*Optn*) C2C12 cells treated with CHIR or DMSO at 4 days postdifferentiation ( $n = 3$  in each group). si-control or si-*Optn* were transfected into C2C12 cells for 48 hours before the initiation of differentiation. Scale bars: 50  $\mu$ m. (C, D) Representative immunoblotting analysis (C) and quantification (D) of MYOG and MYHC in control (si-control) and *Optn* KD (si-*Optn*) C2C12 cells treated with CHIR or DMSO at 4 days postdifferentiation ( $n = 3$  in each group). si-control or si-*Optn* were transfected into C2C12 cells for 48 hours before the initiation of differentiation. (E, F) Representative immunoblotting analysis (E) and quantification (F) of active  $\beta$ -catenin protein levels in nuclear lysates extracted from si-control and si-*Optn* C2C12 cells treated with CHIR or DMSO at 4 days postdifferentiation ( $n = 3$  in each group). si-control or si-*Optn* were transfected into C2C12 cells for 48 hours before the initiation of differentiation. Data are presented as mean  $\pm$  SEM. \* $P < 0.05$  versus control. The underlying data for this figure can be found in [S1 Data](#). The original blot for this figure can be found in [S1 Raw Image](#). GSK3 $\beta$ , glycogen synthase kinase 3 $\beta$ ; H3, histone H3; KD, knockdown; Optn, optineurin; MYHC, myosin heavy chain; MYOG, myogenin; SEM, standard error of the mean.

<https://doi.org/10.1371/journal.pbio.3001619.g006>

corroborating that OPTN involves in Wnt-mediated inhibition of GSK3 $\beta$ . These findings expand insights into the canonical Wnt/GSK3 $\beta$ / $\beta$ -catenin signaling and reveal a novel mechanism on GSK3 $\beta$  inhibition in skeletal muscle.

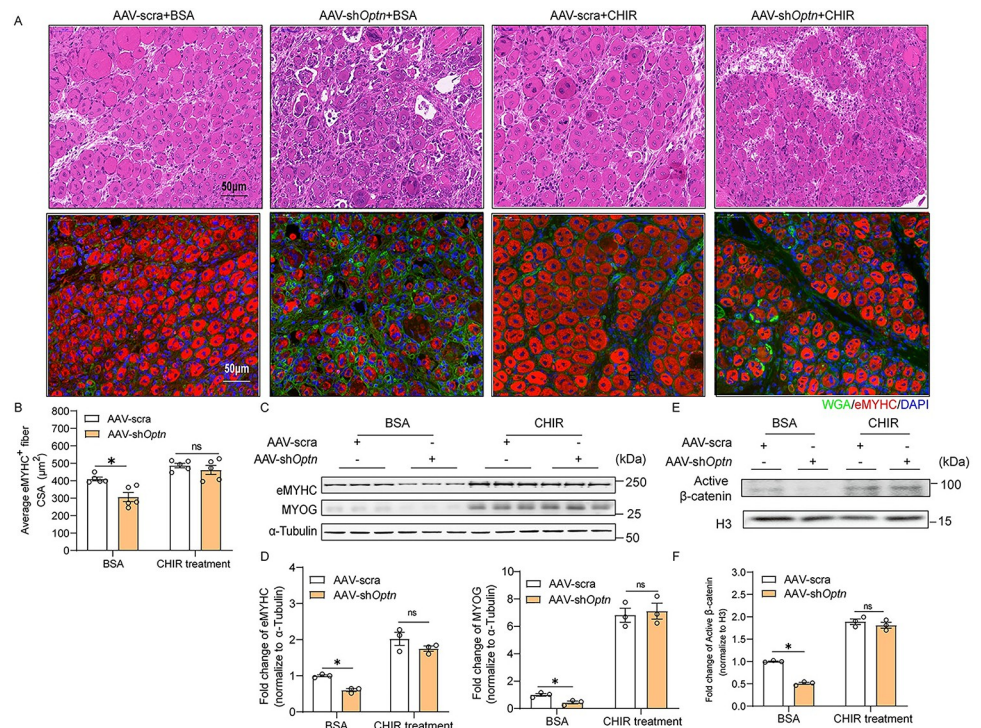

**Fig 7. Inhibition of GSK3 $\beta$  rescues impaired skeletal muscle regeneration induced by *Optn* KD.** (A) Representative HE staining and immunofluorescence analysis of eMYHC<sup>+</sup> fibers in scramble shRNA or sh*Optn* TA muscle (intramuscular injection of CHIR or BSA at 2.5 days postinjury) at 5 days postinjury ( $n = 5$  mice in each group). Scale bar = 50  $\mu$ m. (B) Average CSA of regenerating eMYHC<sup>+</sup> myofibers at 5 days postinjury ( $n = 5$  mice in each group). (C, D) Representative immunoblotting analysis (C) and quantification (D) of myogenic markers (eMYHC and MYOG) in scramble shRNA or sh*Optn* TA muscle (intramuscular injection of CHIR or BSA at 2.5 days postinjury) at 5 days postinjury ( $n = 3$  mice in each group). (E, F) Representative immunoblotting analysis (E) and quantification (F) of active  $\beta$ -catenin protein levels in nuclear lysates extracted from scramble shRNA or sh*Optn* TA muscle (intramuscular injection of CHIR or BSA at 2.5 days postinjury) at 5 days postinjury ( $n = 3$  mice in each group). Data are presented as mean  $\pm$  SEM. \* $P < 0.05$  versus control. The underlying data for this figure can be found in [S1 Data](#). The original blot for this figure can be found in [S1 Raw Image](#). AAV, adeno-associated viral vector; BSA, bovine serum albumin; CSA, cross-sectional fiber area; eMYHC, embryonic myosin heavy chain; GSK3 $\beta$ , glycogen synthase kinase 3 $\beta$ ; HE, hematoxylin–eosin; H3, histone H3; Optn, optineurin; SEM, standard error of the mean; shRNA, short hairpin RNA; WGA, wheat germ agglutinin; TA, tibialis anterior.

<https://doi.org/10.1371/journal.pbio.3001619.g007>

OPTN is an autophagy receptor that plays a central role in selective autophagy [9]. Our data demonstrate that OPTN activates Wnt signaling pathway through autophagic degradation of GSK3 $\beta$  in muscle, suggesting an interaction between autophagy and Wnt signaling pathway during myogenesis. In fact, conflicting results on their relationship have been reported. Up-regulation of autophagy is observed during the formation of mature myotubes and muscle regeneration [64–66], whereas inhibition of DVL2 autophagic degradation (a positive regulator of Wnt signaling pathway) is paradoxically capable of promoting Wnt signaling during muscle regeneration [67]. Similar results have been confirmed by Gao and colleagues, showing that autophagy inhibits Wnt signaling pathway by promoting Dvl2 degradation [68]. These results suggest negative regulation of Wnt signaling pathway by autophagy. Nevertheless, it has recently been reported that autophagy directly promotes nuclear translocation of  $\beta$ -catenin in a GSK3 $\beta$  dependent manner in C2C12 cells [69]. Consistently, our findings suggested that autophagy mediated OPTN-GSK3 $\beta$  axis exerts positive effects on Wnt signaling pathway during myogenic differentiation upon injury. In line with this, during hepatic progenitor cell differentiation, autophagy activates Wnt signaling pathway through interaction of p62 and phosphorylated GSK3 $\beta$  [70]. During adipocyte differentiation, a positive regulator of autophagy tumor protein P53 inducible nuclear protein 2 (TP53INP2) activates Wnt signaling pathway through autophagy-dependent sequestration of GSK3 $\beta$  [61]. Together, these findings suggest that the indeterminate intercommunication between autophagy and Wnt signaling pathway might be affected by dissimilar (negative or positive) regulators.

In summary, our data identify a novel function of OPTN for myogenesis during muscle regeneration. OPTN promotes myogenesis during muscle regeneration through autophagic degradation of Wnt signaling pathway inhibitor GSK3 $\beta$  (Fig 8). These findings uncover an OPTN/GSK3 $\beta$ / $\beta$ -catenin axis that regulates myogenesis during muscle regeneration. Thus, OPTN may be a potential therapeutic target for the prevention and treatment of impaired myogenesis in injury and other muscular disease, such as DMD [71] and aging [72]. Further investigation is needed to assess the myogenic function of OPTN in advanced models to increase its impact on translational medicine.

## Materials and methods

### Animal studies

Six-week-old male C57BL/6J mice purchased from the animal center of Xi'an Jiao Tong University (Xi'an, Shaanxi, PRC) were performed in accordance with the National Institutes of Health (Bethesda, Maryland, United States of America) Guide for the Care and Use of Laboratory Animals and with the approval of Animal Ethical and Welfare Committee of Northwest A&F University (Yang Ling, Shaanxi, PRC) [Approval ID: NWAFU-314031143]. All mice were housed with a 12-hour dark/light cycle with food and water ad libitum and were randomly allocated to the indicated groups. AAV serotype 9 vectors encoding a control scrambled shRNA sequence (scrambled; 5'-TTCTCCGAACGTGTCACGTAA-3') or a short hairpin targeting OPTN (sh*Optn*; 5'-GCAAATGGCCATTCTTCTA-3') under the control of a U6 promoter and expressing EGFP (driven by a CMV promoter) were obtained from Hanbio (Shanghai, PRC). A single dose of  $1.1 \times 10^{12}$  vg/mice in 40  $\mu$ L of AAV2/9 expressing sh*Optn* was delivered to 8-week-old mice injected locally into the right TA muscle, and the same dose of AAV2/9 expressing shRNA control was injected left TA muscle as AAV-shRNA control group. Production and purification of recombinant AAV were made by Hanbio. Mice were treated after recombinant AAV injection for 4 weeks. To induce muscle injury, 50  $\mu$ L of 10  $\mu$ M CTX (HF005, Heng Fei Biotechnology, Shanghai, PRC) was injected into TA muscle. The TA muscle was harvested at 0, 3, 5, and 14 days postinjury. To verify the activity of canonical Wnt



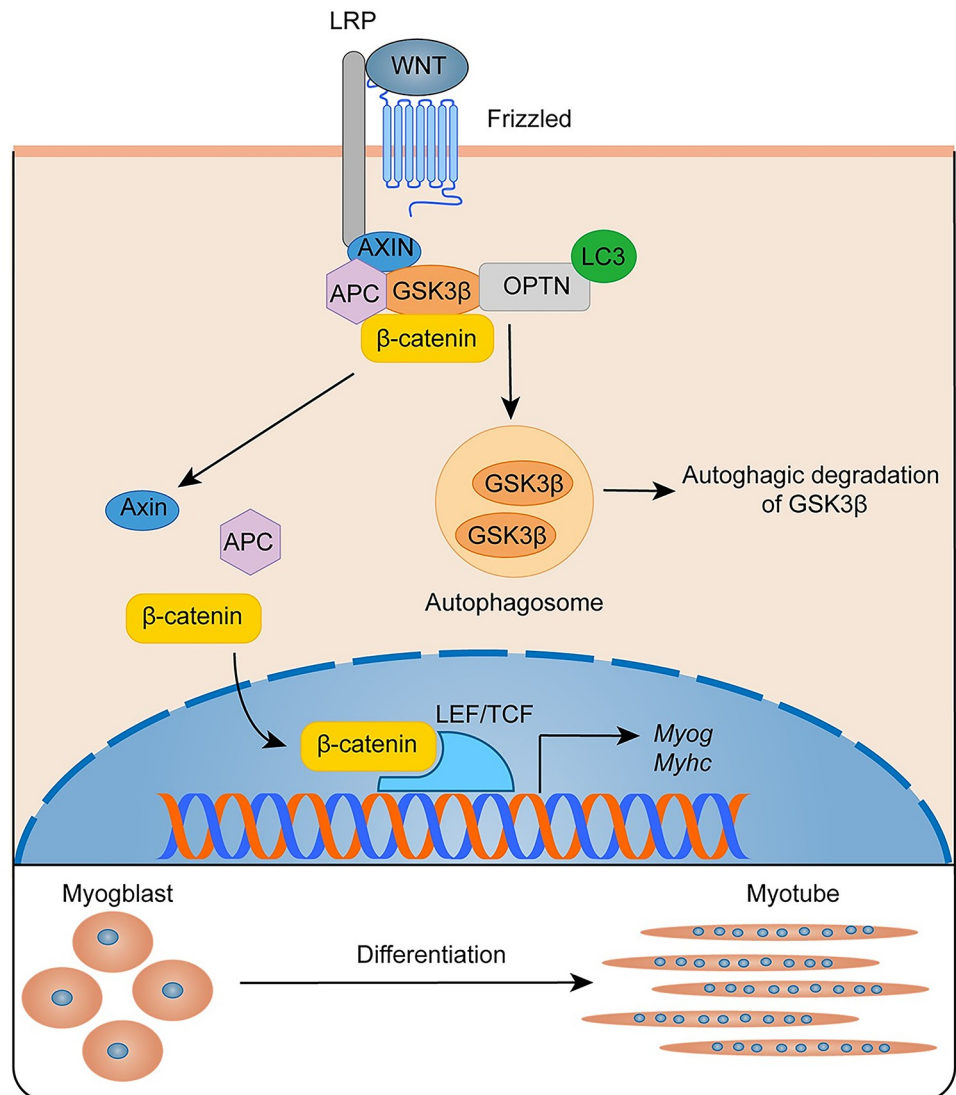

**Fig 8. Schematic model of the role of OPTN on myogenesis during muscle regeneration.** OPTN physically interacts with and targets GSK3 $\beta$  for autophagic degradation and then promotes the nuclear translocation of  $\beta$ -catenin, resulting in activation of Wnt signaling pathway mediated myogenesis during muscle regeneration. APC, adenomatous polyposis coli protein; AXIN, axis inhibition protein; GSK3 $\beta$ , glycogen synthase kinase 3 $\beta$ ; LEF/TCF, lymphoid enhancer factor/T-cell factor; LRP, low-density lipoprotein receptor related protein, OPTN, optineurin.

<https://doi.org/10.1371/journal.pbio.3001619.g008>

signaling in vivo, the TA muscle of scrambled shRNA or sh*Optn* was injected with 20  $\mu$ l Wnt3a (100 ng/ml, 315–20, PeproTech, New Jersey, USA) or PBS (0.1% BSA) per mouse at 1.5 days postinjury [67]. The injured TA muscle was then collected for western blot analysis at 5 days postinjury. To inhibit the activity of GSK3 $\beta$  in vivo, the TA muscle of scrambled shRNA or sh*Optn* was injected with 20  $\mu$ l CHIR-99021 (50 ng/ml, HY-13259, MedChemExpress, Shanghai, PRC) or PBS (0.1% BSA) per mouse at 2.5 days postinjury [67]. The injured TA muscle was then collected for hematoxylin–eosin (HE) analysis and western blotting at 5 days postinjury.

## Histological analysis

The TA muscle was fixed with 4% paraformaldehyde for more than 72 hours and then subjected to dehydration embedding. Finally, paraffin sections of muscle were obtained at a thickness of 2 to 4  $\mu\text{m}$  for HE staining, and whole-slide digital images were collected with an Panoramic DESK Scanner (P-MIDI, P250, 3D HISTECH, Hungary).

## 5-Ethynyl-2'-deoxyuridine assays in vivo and in vitro

Mice were given intraperitoneal injection of 5-Ethynyl-2'-deoxyuridine (EdU) (50 mg/kg body weight, intraperitoneal injection; HY-118411, MedChemExpress) 2 consecutive days before analyzed. EdU was detected with the Cell-Light Apollo 567 Stain Kit (C10317-1, RiboBio, Guangzhou, PRC). About 200 nucleus per sample from one mouse were counted. EdU and Pax7 double-positive nucleus, EdU-positive nucleus, and total cell nucleus were counted using ImageJ. The proliferation of C2C12 myoblasts cultured was determined using the Cell-Light EdU Apollo 567 In Vitro Kit (C10310-1, RiboBio) according to manufacturer's instructions. EdU-positive nucleus and total cell nucleus were counted using ImageJ.

## Cell culture

C2C12 cells were purchased from China Infrastructure of Cell Line Resource and were cultured in growth medium comprising high-glucose Dulbecco's Modified Eagle medium (DMEM) (H30022.01, HyClone, Connecticut, USA) supplemented with 10% fetal bovine serum (FBS) (Z7186FBS-500, ZETA LIFE, California, USA), 1% penicillin/streptomycin. After 48 hours, C2C12 cells were cultured in differentiation medium (high-glucose DMEM supplemented with 2% horse serum and 1% penicillin/streptomycin). Atg5<sup>+/+</sup> and Atg5<sup>-/-</sup> HEK293T cell lines were maintained in DMEM supplemented with 10% FBS and 1% penicillin/streptomycin. Atg5<sup>+/+</sup> and Atg5<sup>-/-</sup> HEK293T cell lines were kindly provided by Dr. Jun Cui (School of Life Sciences, Sun Yat-sen university).

## Plasmids and RNA interference

In order to construct a plasmid encoding HA-OPTN, HA-OPTN-F188A, and OPTN-E481G, the HA-tag was added at the N-terminus of OPTN, OPTN-F188A, and OPTN-E481G. The WT-OPTN, OPTN-F188A, and OPTN-E481G were cloned into the BamHI and XhoI sites of the pcDNA3.1-HA vector. In order to construct a plasmid encoding FLAG-GSK3 $\beta$ , the FLAG tag was added at the N-terminus of GSK3 $\beta$ . GSK3 $\beta$  was then cloned into the NotI and XbaI sites of the pcDNA3.1-FLAG vector. The pcDNA3.1-HA, pcDNA3.1-FLAG, and GFP-LC3B plasmid were provided by Dr. Qingzhu Sun (College of Animal Science and Technology, Northwest A&F University). The TOP flash/FOP flash and Renilla luciferase expression plasmids was provided by Dr. Qingyong Meng (College of Biological Sciences, China Agricultural University). The si-control, si-*Optn*, and si- $\beta$ -catenin were synthesized from GenePharma (Shanghai, PRC). The sequences of *Optn* and  $\beta$ -catenin siRNAs were as follows: *Optn* siRNA1, 5'-GCAGACUUACCUGUUUCAATT-3'; *Optn* siRNA2, 5'-GCAAAUGGCCAUUCUUCU ATT-3'.

## Plasmid transfection and luciferase reporter assay

The plasmids were transfected into C2C12 cells and HEK293T cells using Lipofectamine 3000 (L3000001, Invitrogen, California, USA). In order to identify the activity of canonical Wnt signaling, the TOP flash/FOP flash expression plasmids with the Renilla luciferase expression plasmid were transfected when si-control and si-*Optn* C2C12 cells or HA-vector and HA-Optn

were cultured after 2 days in the differentiation medium. The reporter activity was measured using the Dual-luciferase Reporter Assay System (E1980, Promega, Wisconsin, USA).

### Immunofluorescence

Muscle sections and cultured cells were fixed in 4% formaldehyde for 10 minutes, permeabilized with 0.2% Triton X-100 for 20 minutes on ice, and then blocked in 3% bovine serum albumin in PBS for 1 hour. The samples were blocked in 5% BSA for 2 hours at room temperature. Primary antibodies listed in [S1 Table](#) were incubated in blocking buffer at 4°C overnight. Subsequently, the samples were washed with PBS and stained with the appropriate fluorescently labeled secondary antibodies (fluorescein isothiocyanate or rhodamine) for 1 hour at room temperature. After washing with PBS, DAPI (C0060, Solarbio, Beijing, PRC) was used to stain nucleus for 3 minutes. For immunostaining of muscle sections, whole-slide digital images were collected with an Panoramic DESK Scanner (P-MIDI, P250, 3D HISTECH). Cross-sectional area of the new myofibers was calculated on section images obtained from TA muscle using ImageJ. For immunostaining of cultured cells, images were acquired using BioTEK gen 5 Software. Total cell nucleus and nucleus within myotubes were counted using ImageJ. The distribution of nucleuses per myotube and fusion index (a MYHC<sup>+</sup> cell with at least 3 nucleuses) was calculated as the number of nucleuses in myotubes divided by the total number of nucleuses counted.

### Real-time reverse transcriptase PCR

Real-time PCR were performed as described [73]. Total RNA was isolated from the fresh TA muscle using TRIzol reagent (9109, Takara, Shiga, Japan). Complementary DNA (cDNA) was synthesized from total RNA using cDNA synthesis kit (R333-01, Vazyme Biotech, Nanjing, China) following the manufacturer's instructions. RT-PCR was performed using a CFX 96 Real-Time PCR Detection System (Bio-Rad, Hercules, California, USA). Each 20 mL amplifications contained 10 µl of ChamQ SYBR qPCR Master Mix (Q222-01, Vazyme Biotech), 7.8 mL of sterilized double-distilled water, 1 mL of 1:10 diluted cDNA, and 0.6 mL of each forward and reverse primer. The RT-qPCR program comprised an initial activation step at 95°C for 3 minutes, followed by 38 cycles of 95°C for 15 seconds and 60°C for 30 seconds, and 5 seconds at 65°C. After the PCR, a single product generated in these reactions was confirmed via melting curve analyses. The comparative Ct method ( $2^{-\Delta\Delta Ct}$ ), described in the literature [74] was used to calculate the gene expression values. The primer sequences for genes were listed in [S2 Table](#).

### Immunoblotting

C2C12 cells and TA muscle were washed with PBS and lysed in RIPA lysis buffer (P0013C, Beyotime Biotechnology, Shanghai, PRC). Next, 200 µg of total protein was resolved by 10% or 12% sodium dodecyl sulfate-polyacrylamide gel electrophoresis (SDS-PAGE) electrophoresis and transferred onto a polyvinylidene fluoride (PVDF) (IPVH00010, Millipore, Massachusetts, USA) membrane via electroblotting. The PVDF membrane was blocked in black buffer (5% skim milk powder dissolved in TBST) for 2 hours at room temperature. Primary antibodies listed in [S1 Table](#) were applied in TBST at 4°C overnight. Subsequently, the PVDF membrane was washed 4 times with TBST (5 minutes per time) and stained with the secondary antibodies (goat anti-rabbit or mouse) for 2 hours at room temperature. After washing with TBST, the ECL Reagent (WBKIS0100, Millipore) was used, and the strips were on film.



## Immunoprecipitation

For immunoprecipitation analysis, the TA muscle and cultured cells were homogenized with IP lysis buffer (containing 1M pH 7.4 Tris-HCl 25ml, NP40 25ml, NaCl 4.383g, EDTA 0.146g, glycerin 50 ml, and protease inhibitor cocktail), and the total protein was incubated with 5  $\mu$ g of the Rabbit monoclonal antibody to HA, GSK3 $\beta$ , or nonspecific Rabbit IgG for 2 hours at room temperature and then immunoprecipitation with protein A/G magnetic beads (B23201, Bimaker, Shanghai, PRC) at 4°C overnight. After washing 3 times with TPBS (5 minutes per time), the protein-bound beads were finally resuspended in 20  $\mu$ l 1 $\times$  SDS-PAGE loading buffer. The samples were boiled at 95°C for 10 minutes, and the supernatant was loaded on the gel for immunoblotting.

## Treatment with reagents in cell culture

In order to verify the activity of canonical Wnt signaling, si-control and si-OPTN C2C12 cells were treated with either Wnt3a (100 ng/ml, 315–20, PeproTech) or PBS for 24 hours after 2 days in differentiation medium. The cell samples were then collected for western blot analysis. In order to inhibit the activity of GSK3 $\beta$  in OPTN KD C2C12 cells, the OPTN KD C2C12 cells were treated with CHIR-99021 (CHIR; 3  $\mu$ M, HY-10182, MedChemExpress) during differentiation. Western blotting and immunofluorescence analysis were performed after 4 days of differentiation. For CHX chasing assay, cells were treated with CHX (50  $\mu$ g/ml) and collected at the indicated time points and prepared for western blot analysis. To determine which degradation system dominantly controls the degradation of GSK3 $\beta$ , DMSO, MG132 (25  $\mu$ M, HY-13259, MedChemExpress), and 3-MA (5 mM, HY-19312, MedChemExpress) were added to C2C12 cells cultured for 6 hours with or without *Optn* OE to detect the protein expression of GSK3 $\beta$  via western blotting.

## Statistical analysis

All experiments were at least performed in 3 independent experiments. Data are presented as mean  $\pm$  standard error of the mean and were analyzed by 2-tailed Student *t* tests for comparisons between 2 groups or 2-way analysis of variance (ANOVA) with Duncan post hoc test for multiple comparisons. Statistical significance was defined as  $*P < 0.05$  versus controls. All data were analyzed using PASW Statistics 20 (SPSS, Chicago, Illinois, USA).

## Supporting information

**S1 Fig. The quantification of OPTN and eMYHC immunoblotting analysis during muscle regeneration.** (A) The quantification of OPTN immunoblotting analysis in TA of WT mice at 0, 3, 5, and 14 days postinjury ( $n = 3$  mice in each group). (B) The quantification of eMYHC immunoblotting analysis in TA of WT mice at 0, 3, 5, and 14 days postinjury ( $n = 3$  mice in each group). Data are presented as mean  $\pm$  SEM.  $*P < 0.05$  versus control. The underlying data for this figure can be found in **S1 Data**. CTX, cardiotoxin; eMYHC, embryonic myosin heavy chain; OPTN, optineurin; SEM, standard error of the mean; TA, tibialis anterior; WT, wild-type. (TIF)

**S2 Fig. Representative immunofluorescence analysis of OPTN and eMYHC in TA muscle at 5 days postinjury.** The OPTN, newly regenerated myofibers, and nucleus were stained with anti-OPTN antibody (red), anti-eMYHC antibody (green), and DAPI (blue), respectively. Scale bars: 50  $\mu$ m. eMYHC, embryonic myosin heavy chain; OPTN, optineurin; TA, tibialis

anterior.  
(TIF)

**S3 Fig. The efficiency of OPTN KD in mouse TA muscle by AAV shRNA.** (A) Representative immunoblotting analysis (left panel) and quantification (right panel) of the OPTN in C2C12 myoblasts with si-control or si-*Optn* #1–2 transfection ( $n = 3$  in each group). (B) Representative fluorescence image at 4 weeks postinjection of AAV containing scramble RNA or sh*Optn*. (C) Quantification of *Optn* mRNA expression in TA muscle at 4 weeks postinjection of AAV containing scramble RNA or sh*Optn* ( $n = 5$  mice in each group). Representative immunoblotting analysis (left panel) and quantification (right panel) of the OPTN in TA muscle at 4 weeks postinjection of AAV containing scramble RNA or sh*Optn* ( $n = 3$  mice in each group). Data are presented as mean  $\pm$  SEM.  $*P < 0.05$  versus control. The underlying data for this figure can be found in [S1 Data](#). The original blot for this figure can be found in [S1 Raw Image](#). AAV, adeno-associated viral vector; KD, knockdown; OPTN, optineurin; SEM, standard error of the mean; shRNA, short hairpin RNA; TA, tibialis anterior.  
(TIF)

**S4 Fig. OPTN does not affect cell proliferation.** (A) Representative immunofluorescence staining of Pax7 (green), EdU (red), and DAPI (blue) in scramble shRNA or sh*Optn* TA muscle at 3 days postinjury. Scale bar: 50  $\mu\text{m}$ . (B) Quantification of the percentage of Pax7<sup>+</sup>EdU<sup>+</sup> cells in scramble shRNA or sh*Optn* TA muscle at 3 days postinjury ( $n = 5$  mice in each group). (C) Representative immunofluorescence staining of Pax7 (red) and DAPI (blue) in scramble shRNA or sh*Optn* TA muscle at 3 days postinjury. Scale bar: 50  $\mu\text{m}$ . (D) Quantification of the percentage of Pax7<sup>+</sup> cells in scramble shRNA or sh*Optn* TA muscle at 3 days postinjury ( $n = 5$  mice in each group). (E) Representative EdU and DAPI staining analysis in control (si-control) and *Optn* KD (si-*Optn*) C2C12 cells. si-control or si-*Optn* were transfected into C2C12 cells for 24 hours before staining analysis. Scale bar: 300  $\mu\text{m}$ . (F) Quantification of the percentage of EdU-positive cells/total cells in control (si-control) and *Optn* KD (si-*Optn*) C2C12 cells ( $n = 5$  in each group). si-control or si-*Optn* were transfected into C2C12 cells for 24 hours before staining analysis. (G) Representative mRNA expression analysis of cell proliferation-associated genes in C2C12 cells with si-control or si-*Optn* transfection ( $n = 6$  in each group). Cells were collected after 24h transfection. Data are presented as mean  $\pm$  SEM.  $*P < 0.05$  versus control. The underlying data for this figure can be found in [S1 Data](#). AAV, adeno-associated viral vector; EdU, 5-Ethynyl-2'-deoxyuridine; KD, knockdown; OPTN, optineurin; Pax7, paired box 7; SEM, standard error of the mean; shRNA, short hairpin RNA; TA, tibialis anterior.  
(TIF)

**S5 Fig. The quantification of OPTN and MYOG immunoblotting analysis in C2C12 cells during differentiation.** (A) The quantification of OPTN immunoblotting analysis in C2C12 cells during differentiation at the indicated time points (0, 2, 4, 6, and 8 days) ( $n = 3$  in each group). (B) The quantification of MYOG immunoblotting analysis in C2C12 cells during differentiation at the indicated time points (0, 2, 4, 6, and 8 days) ( $n = 3$  in each group). Data are presented as mean  $\pm$  SEM.  $*P < 0.05$  versus control. The underlying data for this figure can be found in [S1 Data](#). MYOG, myogenin; Optn, optineurin; SEM, standard error of the mean.  
(TIF)

**S6 Fig. OPTN promotes myoblast differentiation mediated myogenesis.** (A, B) Representative immunoblotting analysis (A) and quantification (B) of OPTN, MYHC, and MYOG in si-control or si-*Optn* C2C12 cells at 4 days postdifferentiation ( $n = 3$  in each group). si-control or si-*Optn* were transfected into C2C12 cells for 48 hours before the initiation of differentiation.

(C, D) Representative immunoblotting analysis (C) and quantification (D) of OPTN, MYHC and MYOG in control (empty vector) and *Optn* OE C2C12 cells at 4 days postdifferentiation ( $n = 3$  in each group). The empty pcDNA 3.1-HA vector or pcDNA 3.1-HA-*Optn* vector were transfected into C2C12 cells for 48 hours before the initiation of differentiation. Cells were collected at 4 days postdifferentiation. Data are presented as mean  $\pm$  SEM. \* $P < 0.05$  versus control. The underlying data for this figure can be found in [S1 Data](#). The original blot for this figure can be found in [S1 Raw Image](#). MYOG, myogenin; MYHC, myosin heavy chain; OE, overexpressing; Optn, optineurin; SEM, standard error of the mean.

(TIF)

**S7 Fig. OPTN enhances nuclear  $\beta$ -catenin levels in C2C12 cells.** (A, B) Representative immunofluorescence analysis of active  $\beta$ -catenin in *Optn* OE (A) and *Optn* KD (B) C2C12 cells at 4 days postdifferentiation. Scale bar: 10  $\mu$ m. KD, knockdown; OE, overexpressing; Optn, optineurin.

(TIF)

**S8 Fig. OPTN degrades GSK3 $\beta$  via activating LC3-mediated autophagy.** (A) The quantification of GSK3 $\beta$  immunoblotting analysis in *Optn* KD (left panel) and *Optn* OE (right panel) C2C12 cells at 4 days postdifferentiation and then treated with 50  $\mu$ g/ml CHX at indicated time points ( $n = 3$  in each group). (B) The quantification of GSK3 $\beta$  immunoblotting analysis in control (empty vector) or *Optn*-OE C2C12 cells at 4 days postdifferentiation and then treated with DMSO, the proteasome inhibitor MG132 (25  $\mu$ M), or the autophagy inhibitor 3-MA (5 mM) for 6 hours ( $n = 3$  in each group). (C, D) Representative immunoblotting analysis (C) and quantification (D) of GSK3 $\beta$  in WT and *Atg5* KO HEK293T cells transfected with vector or *Optn*-OE ( $n = 3$  in each group). (E) The quantification of LC3 immunoblotting analysis in *Optn* OE and *Optn* KD C2C12 cells at 4 days postdifferentiation ( $n = 3$  in each group). (F) Representative immunofluorescence analysis of GFP-LC3, HA-OPTN, and FLAG-GSK3 $\beta$  in C2C12 cells transfected with GFP-LC3, HA-OPTN plasmids, and FLAG-GSK3 $\beta$  plasmids. Scale bars: 5  $\mu$ m. (G) Co-immunoprecipitation analysis of LC3 and GSK3 $\beta$  in scramble shRNA or sh*Optn* TA muscle at 5 days postinjury. The immunoprecipitation analysis was performed in scramble shRNA or sh*Optn* TA muscle at 5 days postinjury incubated with anti-GSK3 $\beta$  antibody or nonspecific Rabbit IgG (control) to pulldown endogenous LC3. (H) Schematic illustration of the domain organization and molecular validation of mouse *Optn*-F188A and *Optn*-E481G point-mutant plasmids. (I) The quantification of OPTN, GSK3 $\beta$ , MYHC, and MYOG immunoblotting analysis in empty vector, WT-*Optn*, *Optn*-F188A, and *Optn*-E481G overexpressing C2C12 cells at 4 days postdifferentiation ( $n = 3$  in each group). Data are presented as mean  $\pm$  SEM. \* $P < 0.05$  versus control. The underlying data for this figure can be found in [S1 Data](#). The original blot for this figure can be found in [S1 Raw Image](#). AAV, adeno-associated viral vector; CHX, cycloheximide; GSK3 $\beta$ , glycogen synthase kinase 3 $\beta$ ; KD, knockdown; KO, knockout; LIR, LC3-interacting region; MYHC, myosin heavy chain; MYOG, myogenin; OE, overexpressing; OPTN, optineurin; SEM, standard error of the mean; shRNA, short hairpin RNA; TA, tibialis anterior; UBAN, ubiquitin-binding domain; 3-MA, 3-methyladenine.

(TIF)

**S1 Table. Primary antibodies used in this study.**  
(DOCX)

**S2 Table. qRT-PCR primers used in this study.**  
(DOCX)



**S1 Data.** Contains underlying data for Figs 1A, 1F, 1G, 1I, 1J, 2D, 2E, 2G, 2H, 2J, 2K, 2M, 2N, 3A, 3B, 3C, 3D, 3F, 4A, 4B, 4C, 4D, 4E, 5I, 6A, 6B, 6D, 6F, 7B, 7D, and 7F and S1A, S1B, S3A, S3C, S3D, S4B, S4D, S4F, S4G, S5A, S5B, S6B, S6D, S8A, S8B, S8D, S8E, and S8I Figs.

(XLSX)

**S1 Raw Image.** Original blot contains Figs 1B, 1H, 2A, 2F, 2L, 3E, 3F, 4A, 4B, 4C, 4D, 4E, 5A, 5B, 5C, 5D, 5E, 5G, 6C, 6E, 7C, and 7E and S3A, S3D, S6A, S6C, S8C, and S8G Figs.

(PDF)

## Acknowledgments

The authors would like to thank Dr. Jun Cui (School of Life Sciences, Sun Yat-sen university, Guangzhou, PRC) for the generous provision of valuable Atg5<sup>-/-</sup> HEK293T cell lines; Dr. Qing-yong Meng (College of Biological Sciences, China Agricultural University, Beijing, PRC) for generous provision of the TOP flash/FOP flash and Renilla luciferase expression plasmids; and Life Science Research Core Services of Northwest A&F University for image analysis.

## Author Contributions

**Conceptualization:** Xiao Chen Shi, Bo Xia, Rui Xin Zhang, Dan Yang Zhang, Huan Liu, Bao Cai Xie, Jiang Wei Wu.

**Data curation:** Xiao Chen Shi, Bo Xia, Jian Feng Zhang, Dan Yang Zhang, Huan Liu, Bao Cai Xie, Jiang Wei Wu.

**Formal analysis:** Bo Xia.

**Investigation:** Bo Xia.

**Methodology:** Jian Feng Zhang, Rui Xin Zhang, Yong Liang Wang.

**Supervision:** Bo Xia, Jiang Wei Wu.

**Validation:** Rui Xin Zhang.

**Writing – original draft:** Xiao Chen Shi, Jiang Wei Wu.

**Writing – review & editing:** Xiao Chen Shi, Yong Liang Wang, Jiang Wei Wu.

## References

1. Giudice J, Taylor JM. Muscle as a paracrine and endocrine organ. *Curr Opin Pharmacol.* 2017; 34:49–55. Epub 2017/06/13. <https://doi.org/10.1016/j.coph.2017.05.005> PMID: 28605657; PubMed Central PMCID: PMC5808999.
2. Chal J, Pourquie O. Making muscle: skeletal myogenesis in vivo and in vitro. *Development.* 2017; 144(12):2104–22. Epub 2017/06/22. <https://doi.org/10.1242/dev.151035> PMID: 28634270.
3. Sincennes MC, Brun CE, Rudnicki MA. Concise Review: Epigenetic Regulation of Myogenesis in Health and Disease. *Stem Cells Transl Med.* 2016; 5(3):282–90. Epub 2016/01/23. <https://doi.org/10.5966/sctm.2015-0266> PMID: 26798058; PubMed Central PMCID: PMC4807671.
4. Bentzinger CF, Wang YX, Rudnicki MA. Building muscle: molecular regulation of myogenesis. *Cold Spring Harb Perspect Biol.* 2012; 4(2). Epub 2012/02/04. <https://doi.org/10.1101/cshperspect.a008342> PMID: 22300977; PubMed Central PMCID: PMC3281568.
5. Charge SB, Rudnicki MA. Cellular and molecular regulation of muscle regeneration. *Physiol Rev.* 2004; 84(1):209–38. Epub 2004/01/13. <https://doi.org/10.1152/physrev.00019.2003> PMID: 14715915.
6. Rezaie T, Sarfarazi M. Molecular cloning, genomic structure, and protein characterization of mouse optineurin. *Genomics.* 2005; 85(1):131–8. Epub 2004/12/21. <https://doi.org/10.1016/j.ygeno.2004.10.011> PMID: 15607428.

7. Maruyama H, Morino H, Ito H, Izumi Y, Kato H, Watanabe Y, et al. Mutations of optineurin in amyotrophic lateral sclerosis. *Nature*. 2010; 465(7295):223–6. Epub 2010/04/30. <https://doi.org/10.1038/nature08971> PMID: 20428114.
8. Wong YC, Holzbaur EL. Temporal dynamics of PARK2/parkin and OPTN/optineurin recruitment during the mitophagy of damaged mitochondria. *Autophagy*. 2015; 11(2):422–4. Epub 2015/03/25. <https://doi.org/10.1080/15548627.2015.1009792> PMID: 25801386; PubMed Central PMCID: PMC4502688.
9. Liu ZZ, Hong CG, Hu WB, Chen ML, Duan R, Li HM, et al. Autophagy receptor OPTN (optineurin) regulates mesenchymal stem cell fate and bone-fat balance during aging by clearing FABP3. *Autophagy*. 2020:1–17. Epub 2020/11/05. <https://doi.org/10.1080/15548627.2019.1665293> PMID: 31516068.
10. Qiu Y, Wang J, Li H, Yang B, Wang J, He Q, et al. Emerging views of OPTN (optineurin) function in the autophagic process associated with disease. *Autophagy*. 2021:1–13. Epub 2021/03/31. <https://doi.org/10.1080/15548627.2021.1908722> PMID: 33783320.
11. Slowicka K, Vereecke L, van Loo G. Cellular Functions of Optineurin in Health and Disease. *Trends Immunol*. 2016; 37(9):621–33. Epub 2016/08/03. <https://doi.org/10.1016/j.it.2016.07.002> PMID: 27480243.
12. Rezaie T, Child A, Hitchings R, Brice G, Miller L, Coca-Prados M, et al. Adult-onset primary open-angle glaucoma caused by mutations in optineurin. *Science*. 2002; 295(5557):1077–9. Epub 2002/02/09. <https://doi.org/10.1126/science.1066901> PMID: 11834836.
13. Ranganathan R, Haque S, Coley K, Shephard S, Cooper-Knock J, Kirby J. Multifaceted Genes in Amyotrophic Lateral Sclerosis-Frontotemporal Dementia. *Front Neurosci*. 2020; 14:684. Epub 2020/08/01. <https://doi.org/10.3389/fnins.2020.00684> PMID: 32733193; PubMed Central PMCID: PMC7358438.
14. Girardi F, Le Grand F. Wnt Signaling in Skeletal Muscle Development and Regeneration. *Prog Mol Biol Transl Sci*. 2018; 153:157–79. Epub 2018/02/02. <https://doi.org/10.1016/bs.pmbts.2017.11.026> PMID: 29389515.
15. Suzuki A, Minamide R, Iwata J. WNT/beta-catenin signaling plays a crucial role in myoblast fusion through regulation of nephrin expression during development. *Development*. 2018; 145(23). Epub 2018/11/06. <https://doi.org/10.1242/dev.168351> PMID: 30389854; PubMed Central PMCID: PMC6288386.
16. Polesskaya A, Seale P, Rudnicki MA. Wnt signaling induces the myogenic specification of resident CD45+ adult stem cells during muscle regeneration. *Cell*. 2003; 113(7):841–52. Epub 2003/07/03. [https://doi.org/10.1016/s0092-8674\(03\)00437-9](https://doi.org/10.1016/s0092-8674(03)00437-9) PMID: 12837243.
17. Bilic J, Huang YL, Davidson G, Zimmermann T, Cruciat CM, Bienz M, et al. Wnt induces LRP6 signalosomes and promotes dishevelled-dependent LRP6 phosphorylation. *Science*. 2007; 316(5831):1619–22. Epub 2007/06/16. <https://doi.org/10.1126/science.1137065> PMID: 17569865.
18. Borello U, Berarducci B, Murphy P, Bajard L, Buffa V, Piccolo S, et al. The Wnt/beta-catenin pathway regulates Gli-mediated Myf5 expression during somitogenesis. *Development*. 2006; 133(18):3723–32. Epub 2006/08/29. <https://doi.org/10.1242/dev.02517> PMID: 16936075.
19. Kim CH, Neiswender H, Baik EJ, Xiong WC, Mei L. Beta-catenin interacts with MyoD and regulates its transcription activity. *Mol Cell Biol*. 2008; 28(9):2941–51. Epub 2008/03/05. <https://doi.org/10.1128/MCB.01682-07> PMID: 18316399; PubMed Central PMCID: PMC2293083.
20. Suzuki A, Pelikan RC, Iwata J. WNT/beta-Catenin Signaling Regulates Multiple Steps of Myogenesis by Regulating Step-Specific Targets. *Mol Cell Biol*. 2015; 35(10):1763–76. Epub 2015/03/11. <https://doi.org/10.1128/MCB.01180-14> PMID: 25755281; PubMed Central PMCID: PMC4405648.
21. Ridgeway AG, Petropoulos H, Wilton S, Skerjanc IS. Wnt signaling regulates the function of MyoD and myogenin. *J Biol Chem*. 2000; 275(42):32398–405. Epub 2000/08/01. <https://doi.org/10.1074/jbc.M004349200> PMID: 10915791.
22. Liu C, Li Y, Semenov M, Han C, Baeg GH, Tan Y, et al. Control of beta-catenin phosphorylation/degradation by a dual-kinase mechanism. *Cell*. 2002; 108(6):837–47. Epub 2002/04/17. [https://doi.org/10.1016/s0092-8674\(02\)00685-2](https://doi.org/10.1016/s0092-8674(02)00685-2) PMID: 11955436.
23. van der Velden JL, Langen RC, Kelders MC, Wouters EF, Janssen-Heininger YM, Schols AM. Inhibition of glycogen synthase kinase-3beta activity is sufficient to stimulate myogenic differentiation. *Am J Physiol Cell Physiol*. 2006; 290(2):C453–62. Epub 2005/09/16. <https://doi.org/10.1152/ajpcell.00068.2005> PMID: 16162663.
24. Pansters NA, Schols AM, Verhees KJ, de Theije CC, Snepvangers FJ, Kelders MC, et al. Muscle-specific GSK-3beta ablation accelerates regeneration of disuse-atrophied skeletal muscle. *Biochim Biophys Acta*. 2015; 1852(3):490–506. Epub 2014/12/17. <https://doi.org/10.1016/j.bbadis.2014.12.006> PMID: 25496993.

25. Lorzadeh S, Kohan L, Ghavami S, Azarpira N. Autophagy and the Wnt signaling pathway: A focus on Wnt/beta-catenin signaling. *Biochim Biophys Acta Mol Cell Res.* 2021; 1868(3):118926. Epub 2020/12/15. <https://doi.org/10.1016/j.bbamcr.2020.118926> PMID: 33316295.
26. Steinhart Z, Angers S. Wnt signaling in development and tissue homeostasis. *Development.* 2018; 145(11). Epub 2018/06/10. <https://doi.org/10.1242/dev.146589> PMID: 29884654.
27. Cheng X, Ma X, Zhu Q, Song D, Ding X, Li L, et al. Pacer Is a Mediator of mTORC1 and GSK3-TIP60 Signaling in Regulation of Autophagosome Maturation and Lipid Metabolism. *Mol Cell.* 2019; 73(4):788–802 e7. Epub 2019/02/02. <https://doi.org/10.1016/j.molcel.2018.12.017> PMID: 30704899.
28. Shi Y, Reitmaier B, Regenbogen J, Slowey RM, Opalenik SR, Wolf E, et al. CARP, a cardiac ankyrin repeat protein, is up-regulated during wound healing and induces angiogenesis in experimental granulation tissue. *Am J Pathol.* 2005; 166(1):303–12. Epub 2005/01/06. [https://doi.org/10.1016/S0002-9440\(10\)62254-7](https://doi.org/10.1016/S0002-9440(10)62254-7) PMID: 15632022; PubMed Central PMCID: PMC1602297.
29. Laure L, Suel L, Roudaut C, Bourg N, Ouali A, Bartoli M, et al. Cardiac ankyrin repeat protein is a marker of skeletal muscle pathological remodelling. *FEBS J.* 2009; 276(3):669–84. Epub 2009/01/16. <https://doi.org/10.1111/j.1742-4658.2008.06814.x> PMID: 19143834.
30. Ogawa R, Ma Y, Yamaguchi M, Ito T, Watanabe Y, Ohtani T, et al. Doublecortin marks a new population of transiently amplifying muscle progenitor cells and is required for myofiber maturation during skeletal muscle regeneration. *Development.* 2015; 142(1):51–61. Epub 2014/12/07. <https://doi.org/10.1242/dev.112557> PMID: 25480916.
31. Rancourt A, Dufresne SS, St-Pierre G, Levesque JC, Nakamura H, Kikuchi Y, et al. Galectin-3 and N-acetylglucosamine promote myogenesis and improve skeletal muscle function in the mdx model of Duchenne muscular dystrophy. *FASEB J.* 2018; fj201701151RRR. Epub 2018/06/13. <https://doi.org/10.1096/fj.201701151RRR> PMID: 29894670; PubMed Central PMCID: PMC6219824.
32. Das S, Morvan F, Morozzi G, Jourde B, Minetti GC, Kahle P, et al. ATP Citrate Lyase Regulates Myofiber Differentiation and Increases Regeneration by Altering Histone Acetylation. *Cell Rep.* 2017; 21(11):3003–11. Epub 2017/12/16. <https://doi.org/10.1016/j.celrep.2017.11.038> PMID: 29241530.
33. Deng Z, Purtell K, Lachance V, Wold MS, Chen S, Yue Z. Autophagy Receptors and Neurodegenerative Diseases. *Trends Cell Biol.* 2017; 27(7):491–504. Epub 2017/02/09. <https://doi.org/10.1016/j.tcb.2017.01.001> PMID: 28169082.
34. Comai G, Tajbakhsh S. Molecular and cellular regulation of skeletal myogenesis. *Curr Top Dev Biol.* 2014; 110:1–73. Epub 2014/09/25. <https://doi.org/10.1016/B978-0-12-405943-6.00001-4> PMID: 25248473.
35. Masters JR. HeLa cells 50 years on: the good, the bad and the ugly. *Nat Rev Cancer.* 2002; 2(4):315–9. Epub 2002/05/11. <https://doi.org/10.1038/nrc775> PMID: 12001993.
36. Nagaraj N, Wisniewski JR, Geiger T, Cox J, Kircher M, Kelso J, et al. Deep proteome and transcriptome mapping of a human cancer cell line. *Mol Syst Biol.* 2011; 7:548. Epub 2011/11/10. <https://doi.org/10.1038/msb.2011.81> PMID: 22068331; PubMed Central PMCID: PMC3261714.
37. He TC, Sparks AB, Rago C, Hermeking H, Zawel L, da Costa LT, et al. Identification of c-MYC as a target of the APC pathway. *Science.* 1998; 281(5382):1509–12. Epub 1998/09/04. <https://doi.org/10.1126/science.281.5382.1509> PMID: 9727977.
38. Shtutman M, Zhurinsky J, Simcha I, Albanese C, D'Amico M, Pestell R, et al. The cyclin D1 gene is a target of the beta-catenin/LEF-1 pathway. *Proc Natl Acad Sci U S A.* 1999; 96(10):5522–7. Epub 1999/05/13. <https://doi.org/10.1073/pnas.96.10.5522> PMID: 10318916; PubMed Central PMCID: PMC21892.
39. Howe LR, Watanabe O, Leonard J, Brown AM. Twist is up-regulated in response to Wnt1 and inhibits mouse mammary cell differentiation. *Cancer Res.* 2003; 63(8):1906–13. Epub 2003/04/19. PMID: 12702582.
40. ten Berge D, Brugmann SA, Helms JA, Nusse R. Wnt and FGF signals interact to coordinate growth with cell fate specification during limb development. *Development.* 2008; 135(19):3247–57. Epub 2008/09/09. <https://doi.org/10.1242/dev.023176> PMID: 18776145; PubMed Central PMCID: PMC2756806.
41. Cadigan KM, Waterman ML. TCF/LEFs and Wnt signaling in the nucleus. *Cold Spring Harb Perspect Biol.* 2012; 4(11). Epub 2012/10/02. <https://doi.org/10.1101/cshperspect.a007906> PMID: 23024173; PubMed Central PMCID: PMC3536346.
42. Gao C, Chen YG. Dishevelled: The hub of Wnt signaling. *Cell Signal.* 2010; 22(5):717–27. Epub 2009/12/17. <https://doi.org/10.1016/j.cellsig.2009.11.021> PMID: 20006983.
43. Lybrand DB, Naiman M, Laumann JM, Boardman M, Petshow S, Hansen K, et al. Destruction complex dynamics: Wnt/beta-catenin signaling alters Axin-GSK3beta interactions in vivo. *Development.* 2019; 146(13). Epub 2019/06/14. <https://doi.org/10.1242/dev.164145> PMID: 31189665; PubMed Central PMCID: PMC6633605.

44. Wu D, Pan W. GSK3: a multifaceted kinase in Wnt signaling. *Trends Biochem Sci.* 2010; 35(3):161–8. Epub 2009/11/04. <https://doi.org/10.1016/j.tibs.2009.10.002> PMID: 19884009; PubMed Central PMCID: PMC2834833.
45. Ding VW, Chen RH, McCormick F. Differential regulation of glycogen synthase kinase 3beta by insulin and Wnt signaling. *J Biol Chem.* 2000; 275(42):32475–81. Epub 2000/07/27. <https://doi.org/10.1074/jbc.M005342200> PMID: 10913153.
46. Klionsky DJ, Abdel-Aziz AK, Abdelfatah S, Abdellatif M, Abdoli A, Abel S, et al. Guidelines for the use and interpretation of assays for monitoring autophagy (4th edition)(1). *Autophagy.* 2021; 17(1):1–382. Epub 2021/02/27. <https://doi.org/10.1080/15548627.2020.1797280> PMID: 33634751; PubMed Central PMCID: PMC7996087.
47. Wild P, Farhan H, McEwan DG, Wagner S, Rogov VV, Brady NR, et al. Phosphorylation of the autophagy receptor optineurin restricts Salmonella growth. *Science.* 2011; 333(6039):228–33. Epub 2011/05/28. <https://doi.org/10.1126/science.1205405> PMID: 21617041; PubMed Central PMCID: PMC3714538.
48. Li F, Xu D, Wang Y, Zhou Z, Liu J, Hu S, et al. Structural insights into the ubiquitin recognition by OPTN (optineurin) and its regulation by TBK1-mediated phosphorylation. *Autophagy.* 2018; 14(1):66–79. Epub 2018/02/03. <https://doi.org/10.1080/15548627.2017.1391970> PMID: 29394115; PubMed Central PMCID: PMC5846504.
49. Padman BS, Nguyen TN, Uoselis L, Skulsuppaisarn M, Nguyen LK, Lazarou M. LC3/GABARAPs drive ubiquitin-independent recruitment of Optineurin and NDP52 to amplify mitophagy. *Nat Commun.* 2019; 10(1):408. Epub 2019/01/27. <https://doi.org/10.1038/s41467-019-08335-6> PMID: 30679426; PubMed Central PMCID: PMC6345886.
50. Wong YC, Holzbaur EL. Optineurin is an autophagy receptor for damaged mitochondria in parkin-mediated mitophagy that is disrupted by an ALS-linked mutation. *Proc Natl Acad Sci U S A.* 2014; 111(42):E4439–48. Epub 2014/10/09. <https://doi.org/10.1073/pnas.1405752111> PMID: 25294927; PubMed Central PMCID: PMC4210283.
51. Demonbreun AR, McNally EM. Muscle cell communication in development and repair. *Curr Opin Pharmacol.* 2017; 34:7–14. Epub 2017/04/19. <https://doi.org/10.1016/j.coph.2017.03.008> PMID: 28419894; PubMed Central PMCID: PMC5641474.
52. von Maltzahn J, Chang NC, Bentzinger CF, Rudnicki MA. Wnt signaling in myogenesis. *Trends Cell Biol.* 2012; 22(11):602–9. Epub 2012/09/05. <https://doi.org/10.1016/j.tcb.2012.07.008> PMID: 22944199; PubMed Central PMCID: PMC3479319.
53. Yu Y, Qi L, Wu J, Wang Y, Fang W, Zhang H. Kindlin 2 regulates myogenic related factor myogenin via a canonical Wnt signaling in myogenic differentiation. *PLoS ONE.* 2013; 8(5):e63490. Epub 2013/05/30. <https://doi.org/10.1371/journal.pone.0063490> PMID: 23717433; PubMed Central PMCID: PMC3661532.
54. Meadows E, Cho JH, Flynn JM, Klein WH. Myogenin regulates a distinct genetic program in adult muscle stem cells. *Dev Biol.* 2008; 322(2):406–14. Epub 2008/08/30. <https://doi.org/10.1016/j.ydbio.2008.07.024> PMID: 18721801.
55. He X, Semenov M, Tamai K, Zeng X. LDL receptor-related proteins 5 and 6 in Wnt/beta-catenin signaling: arrows point the way. *Development.* 2004; 131(8):1663–77. Epub 2004/04/16. <https://doi.org/10.1242/dev.01117> PMID: 15084453.
56. Liu X, Rubin JS, Kimmel AR. Rapid, Wnt-induced changes in GSK3beta associations that regulate beta-catenin stabilization are mediated by Galpha proteins. *Curr Biol.* 2005; 15(22):1989–97. Epub 2005/11/24. <https://doi.org/10.1016/j.cub.2005.10.050> PMID: 16303557.
57. Hagen T, Cross DA, Culbert AA, West A, Frame S, Morrice N, et al. FRAT1, a substrate-specific regulator of glycogen synthase kinase-3 activity, is a cellular substrate of protein kinase A. *J Biol Chem.* 2006; 281(46):35021–9. Epub 2006/09/20. <https://doi.org/10.1074/jbc.M607003200> PMID: 16982607.
58. Strovel ET, Wu D, Sussman DJ. Protein phosphatase 2Calpha dephosphorylates axin and activates LEF-1-dependent transcription. *J Biol Chem.* 2000; 275(4):2399–403. Epub 2000/01/25. <https://doi.org/10.1074/jbc.275.4.2399> PMID: 10644691.
59. Taelman VF, Dobrowolski R, Plouhinec JL, Fuentealba LC, Vorwald PP, Gumper I, et al. Wnt signaling requires sequestration of glycogen synthase kinase 3 inside multivesicular endosomes. *Cell.* 2010; 143(7):1136–48. Epub 2010/12/25. <https://doi.org/10.1016/j.cell.2010.11.034> PMID: 21183076; PubMed Central PMCID: PMC3022472.
60. Vinyoles M, Del Valle-Perez B, Curto J, Vinas-Castells R, Alba-Castellon L, Garcia de Herreros A, et al. Multivesicular GSK3 sequestration upon Wnt signaling is controlled by p120-catenin/cadherin interaction with LRP5/6. *Mol Cell.* 2014; 53(3):444–57. Epub 2014/01/15. <https://doi.org/10.1016/j.molcel.2013.12.010> PMID: 24412065.



61. Romero M, Sabate-Perez A, Francis VA, Castrillon-Rodriguez I, Diaz-Ramos A, Sanchez-Feutrie M, et al. TP53INP2 regulates adiposity by activating beta-catenin through autophagy-dependent sequestration of GSK3beta. *Nat Cell Biol.* 2018; 20(4):443–54. Epub 2018/03/30. <https://doi.org/10.1038/s41556-018-0072-9> PMID: 29593329.
62. Berg TO, Fengsrud M, Stromhaug PE, Berg T, Seglen PO. Isolation and characterization of rat liver amphisomes. Evidence for fusion of autophagosomes with both early and late endosomes. *J Biol Chem.* 1998; 273(34):21883–92. Epub 1998/08/15. <https://doi.org/10.1074/jbc.273.34.21883> PMID: 9705327.
63. Katzmann DJ, Odorizzi G, Emr SD. Receptor downregulation and multivesicular-body sorting. *Nat Rev Mol Cell Biol.* 2002; 3(12):893–905. Epub 2002/12/04. <https://doi.org/10.1038/nrm973> PMID: 12461556.
64. Fortini P, Ferretti C, Iorio E, Cagnin M, Garribba L, Pietraforte D, et al. The fine tuning of metabolism, autophagy and differentiation during in vitro myogenesis. *Cell Death Dis.* 2016; 7:e2168. Epub 2016/04/01. <https://doi.org/10.1038/cddis.2016.50> PMID: 27031965; PubMed Central PMCID: PMC4823951.
65. Sin J, Andres AM, Taylor DJ, Weston T, Hiraumi Y, Stotland A, et al. Mitophagy is required for mitochondrial biogenesis and myogenic differentiation of C2C12 myoblasts. *Autophagy.* 2016; 12(2):369–80. Epub 2015/11/15. <https://doi.org/10.1080/15548627.2015.1115172> PMID: 26566717; PubMed Central PMCID: PMC4836019.
66. Fiacco E, Castagnetti F, Bianconi V, Madaro L, De Bardi M, Nazio F, et al. Autophagy regulates satellite cell ability to regenerate normal and dystrophic muscles. *Cell Death Differ.* 2016; 23(11):1839–49. Epub 2016/10/19. <https://doi.org/10.1038/cdd.2016.70> PMID: 27447110; PubMed Central PMCID: PMC5071573.
67. Zhang K, Zhang Y, Gu L, Lan M, Liu C, Wang M, et al. Islr regulates canonical Wnt signaling-mediated skeletal muscle regeneration by stabilizing Dishevelled-2 and preventing autophagy. *Nat Commun.* 2018; 9(1):5129. Epub 2018/12/05. <https://doi.org/10.1038/s41467-018-07638-4> PMID: 30510196; PubMed Central PMCID: PMC6277414.
68. Gao C, Cao W, Bao L, Zuo W, Xie G, Cai T, et al. Autophagy negatively regulates Wnt signalling by promoting Dishevelled degradation. *Nat Cell Biol.* 2010; 12(8):781–90. Epub 2010/07/20. <https://doi.org/10.1038/ncb2082> PMID: 20639871.
69. Zhang Z, Zhang L, Zhou Y, Li L, Zhao J, Qin W, et al. Increase in HDAC9 suppresses myoblast differentiation via epigenetic regulation of autophagy in hypoxia. *Cell Death Dis.* 2019; 10(8):552. Epub 2019/07/20. <https://doi.org/10.1038/s41419-019-1763-2> PMID: 31320610; PubMed Central PMCID: PMC6639330.
70. Ma Z, Li F, Chen L, Gu T, Zhang Q, Qu Y, et al. Autophagy promotes hepatic differentiation of hepatic progenitor cells by regulating the Wnt/beta-catenin signaling pathway. *J Mol Histol.* 2019; 50(1):75–90. Epub 2019/01/04. <https://doi.org/10.1007/s10735-018-9808-x> PMID: 30604254; PubMed Central PMCID: PMC6323068.
71. Chang NC, Chevalier FP, Rudnicki MA. Satellite Cells in Muscular Dystrophy—Lost in Polarity. *Trends Mol Med.* 2016; 22(6):479–96. Epub 2016/05/11. <https://doi.org/10.1016/j.molmed.2016.04.002> PMID: 27161598; PubMed Central PMCID: PMC4885782.
72. Belli R, Bonato A, De Angelis L, Mirabilii S, Ricciardi MR, Tafuri A, et al. Metabolic Reprogramming Promotes Myogenesis During Aging. *Front Physiol.* 2019; 10:897. Epub 2019/07/30. <https://doi.org/10.3389/fphys.2019.00897> PMID: 31354530; PubMed Central PMCID: PMC6636331.
73. Shi XC, Jin A, Sun J, Tian JJ, Ji H, Chen LQ, et al. The protein-sparing effect of alpha-lipoic acid in juvenile grass carp, *Ctenopharyngodon idellus*: effects on lipolysis, fatty acid beta-oxidation and protein synthesis. *Br J Nutr.* 2018; 120(9):977–87. Epub 2018/09/11. <https://doi.org/10.1017/S000711451800226X> PMID: 30198455.
74. Livak KJ, Schmittgen TD. Analysis of relative gene expression data using real-time quantitative PCR and the 2<sup>-</sup>(Delta Delta C(T)) Method. *Methods.* 2001; 25(4):402–8. Epub 2002/02/16. <https://doi.org/10.1006/meth.2001.1262> PMID: 11846609.
